# Supplementary material
Source: publisher figshare collection journal article supplement (https://acs.figshare.com/ndownloader/files/5577405)
Supplement: Supplementary file 1 [file 5577405]

# Supporting Information

## Low Temperature Activation of Supported Metathesis Catalysts by Organosilicon Reducing Agents

Victor Mougel, Ka-Wing Chan, Georges Siddiqi, Kento Kawakita, Haruki Nagae,  
Hayato Tsurugi, Kazushi Mashima, Olga Safonova, Christophe Copéret.

|                                                            |    |
|------------------------------------------------------------|----|
| A) General procedures.....                                 | 2  |
| B) Syntheses .....                                         | 3  |
| C) Single crystal XRD structures .....                     | 8  |
| D) IR.....                                                 | 11 |
| E) Solid State NMR.....                                    | 14 |
| F) UV-Vis DRS .....                                        | 19 |
| G) Powder XRD .....                                        | 20 |
| H) XAS.....                                                | 21 |
| I) EPR spectroscopy .....                                  | 26 |
| J) Titration of surface OH sites:.....                     | 28 |
| K) Redox titration of surface W sites .....                | 29 |
| L) Catalytic activity .....                                | 30 |
| M) Recycling and poisoning studies.....                    | 35 |
| N) Characterization of the active sites and mechanism..... | 39 |
| O) References .....                                        | 42 |

## A) General procedures

All experiments were carried out under dry and oxygen free argon atmosphere using either standard Schlenk or glove-box techniques for organometallic synthesis. For the syntheses, reactions were carried out using high vacuum lines ( $10^{-5}$  mbar) and glove-box techniques. Pentane, toluene and diethyl ether were purified using double MBraun SPS alumina column, and were degassed using three freeze-pump-thaw cycles before being used. DME and THF were distilled from Na/Benzophenone. Silica (Aerosil Degussa,  $200 \text{ m}^2 \cdot \text{g}^{-1}$ ) was compacted with distilled water, calcined at  $500 \text{ }^\circ\text{C}$  under air for 4 h and treated under vacuum ( $10^{-5}$  mbar) at  $500 \text{ }^\circ\text{C}$  for 6 h and then at  $700 \text{ }^\circ\text{C}$  for 10 h (support referred to as  $\text{SiO}_{2-700}$ ) and contained 0.26 mmol of OH per g as measured by titration with  $\text{PhCH}_2\text{MgCl}$ . All infrared (IR) spectra were recorded using a Bruker  $\alpha$ -T spectrometer placed in an Ar glovebox, equipped with OPUS software. A typical experiment consisted in the measurement of transmission in 32 scans in the region from  $4000$  to  $400 \text{ cm}^{-1}$ . The  $^1\text{H}$  and  $^{13}\text{C}$ -NMR spectra were obtained on Bruker Avance III 400, 700, 850 and 1000 MHz Bruker spectrometers equipped with a 4 mm probe. Cross polarization magic angle spinning (CPMAS) and spin echo type experiments were used to measure  $^{13}\text{C}$  and  $^1\text{H}$ , respectively. The radio frequency (RF) field of proton was always set to 100 kHz while the  $^1\text{H}$  decoupling was set to 80 kHz. The solution spectra were recorded in  $\text{C}_6\text{D}_6$  at room temperature. The electronic structures of the catalysts were obtained with a Varian Cary UV-vis spectrophotometer employing a Praying Mantis integration sphere. The UV-vis spectra were processed with Microsoft Excel software, consisting of calculation of the Kubelka-Monk function,  $F(R_\infty)$ , which was extracted from the UV-vis DRS absorbance. The edge energy ( $E_g$ ) for allowed transitions was determined by finding the intercept of the straight line in the low-energy rise of a plot of  $[F(R_\infty)hv]^2$ .<sup>1</sup> Continuous Wave (CW) EPR spectra were measured at X band (9.5-GHz microwave frequency) on a Bruker EMX spectrometer at 110 K. Powder XRD experiments were performed on a STOE Padi Diffractometer in Debye-Scherrer Mode ( $2\theta$ ) with a Dectris Mythen 1K area detector using  $\text{Cu K}\alpha 1$  radiation. The sample was prepared and measured in a sealed quartz capillary. X-ray absorption spectroscopy (XAS) at the W  $L_{\text{III}}$ -edge was measured at the SuperXAS beamline at the Swiss Light Source (SLS; Paul Scherrer Institute, Villigen, Switzerland). The SLS is a third-generation synchrotron operating at a 2.4-GeV electron energy and a current of 400 mA. The SuperXAS beamline is positioned at 2.9 T super-bent port. The incident beam was collimated by a Rh-coated mirror at 2.8 mrad, monochromatized using a channel-cut  $\text{Si}(111)$  monochromator, and focused with an Rh-coated toroidal mirror (at 2.8 mrad) down to  $500 \times 500 \text{ }\mu\text{m}$  with a beam intensity of  $4\text{--}5 \times 10^{11}$  ph/s. Calibration of the beamline energy was performed using Pt reference foil (Pt  $L_{\text{III}}$ -edge position at 11564 eV). XAS spectra in transmission mode were measured at room temperature using ionization chambers filled with He-N<sub>2</sub> gas mixtures. To avoid contact with air, all samples were sealed in a Ar glovebox. Each pellet of samples (with optimized thickness for transmission detection) was placed in two aluminized plastic bags (Polyaniline (15  $\mu\text{m}$ ), polyethylene (15  $\mu\text{m}$ ), Al (12  $\mu\text{m}$ ), polyethylene (75  $\mu\text{m}$ ) from Gruber-Folien GmbH & Co. KG) using an impulse sealer inside a glovebox; one sealing layer was removed just before the measurements. Multiple extended X-ray absorption fine structure (EXAFS) scans (10207–11207 eV) were averaged using new spots for each scan, with a scan time of ca. 30 min. EXAFS data were analyzed using the Ifeffit program package. The EXAFS data were fitted in R-space (1–2.2  $\text{Å}$ ) after a Fourier transform ( $k = 1.5\text{--}14.2 \text{ Å}^{-1}$ ) using a  $k$ -weight of 3.

Compounds  $\text{WO}_2\text{Cl}_2(\text{DME})$ ,<sup>2</sup>  $\text{WOCl}_3(\text{bipy})$ ,<sup>3</sup> 1-methyl-3,6-bis(trimethylsilyl)-1,4-cyclohexadiene (**R1**),<sup>4</sup> 1,4-bis(trimethylsilyl)-1,4-diaza-2,5-cyclohexadiene (**R2**), 2,5-dimethyl-1,4-bis(trimethylsilyl)-1,4-diaza-2,5-cyclohexadiene (**R3**), 2,3,5,6-tetramethyl-1,4-bis(trimethylsilyl)-1,4-diaza-2,5-cyclohexadiene ( $\text{Me}_4\text{-BTDP}$ , **Red**),<sup>5</sup> were synthesized according to literature procedures. Ammonium metatungstate and ammonium heptamolybdate hydrates were purchased from Fluka and used without purification.  $\text{WO}_3/\text{SiO}_2$  and  $\text{MoO}_3/\text{SiO}_2$  were synthesized by incipient wetness impregnation followed by calcination at  $450 \text{ }^\circ\text{C}$ .<sup>1</sup> It was determined by elemental analysis to contain 7.12% W in mass for  $\text{WO}_3/\text{SiO}_2$  and 7% Mo in mass for  $\text{MoO}_3/\text{SiO}_2$ .

## B) Syntheses

### 1) Synthesis of the molecular precursors:

#### Synthesis of [W(O)(OSi(OtBu)<sub>3</sub>)<sub>4</sub>]

[W(O)(OSi(OtBu)<sub>3</sub>)<sub>4</sub>] was synthesized following the procedure described by Tilley.<sup>6</sup> XRD suitable crystals were obtained upon cooling at -40 °C a saturated toluene solution of the complex.

#### Synthesis of [W(O)<sub>2</sub>(OSi(OtBu)<sub>3</sub>)<sub>2</sub>(DME)]

[W(O)<sub>2</sub>(OSi(OtBu)<sub>3</sub>)<sub>2</sub>(DME)] was synthesized using a modification of the procedure described by Tilley.<sup>6</sup> A solution of LiOSi(OtBu)<sub>3</sub> (2.87 g, 10.6 mmol, 2 eq.) in cold toluene (15 mL, -40 °C) was added dropwise to a suspension of WO<sub>2</sub>Cl<sub>2</sub>(DME) (2.00 g, 5.3 mmol, 1 eq.) in toluene (20 mL, -78 °C) containing 200 μL of DME under vigorous stirring. After 1 hour stirring at -78 °C and 2 h at room temperature, the solution was filtered through a short Celite® pad to afford a colorless solution. Crystallization of the product from this solution at -40 °C afforded 3.2 g (3.8 mmol, 72 %) of the title product as large colorless needle shaped crystals suitable for XRD (collected in two crops).

<sup>1</sup>H-NMR (300 MHz, C<sub>6</sub>D<sub>6</sub>) δ 1.38 (s, 54H, (OtBu)<sub>3</sub>), 3.15 (s, 6H, DME), 3.33 (s, 4H, DME).

IR (KBr, cm<sup>-1</sup>): 703(m), 830(m), 858(m), 902(m), 948(m), 962(m), 1028(m), 1066(s), 1191(m), 1243(m), 1366(m), 1390(m), 1473(w), 2975(m).

### 2) Synthesis of the heterogeneous complexes:

#### Synthesis of [(≡SiO)W(O)<sub>2</sub>(OSi(OtBu)<sub>3</sub>)]

A solution of 1.00 g of WO<sub>2</sub>[OSi(O<sup>t</sup>Bu)<sub>3</sub>]<sub>2</sub>(DME) (1.25 mmol, 1.05 equiv.) in benzene (6 mL) was added to a suspension of SiO<sub>2-(700)</sub> (4.61 g, 1.19 mmol, 1 equiv.) in benzene (3 mL) at room temperature. The suspension was slowly stirred at room temperature for 12 h. The white solid was collected by filtration, and was washed by five suspension/filtration cycles in benzene (5 x 2 mL). The resulting solid was dried thoroughly under high vacuum (10<sup>-5</sup> mbar) at room temperature for 3 h to afford 4.55 g of the title compound. All the filtrate solutions were collected and analyzed by <sup>1</sup>H NMR spectroscopy in C<sub>6</sub>D<sub>6</sub> using ferrocene as internal standard, indicating that 1.7 mmol of (tBuO)<sub>3</sub>SiOH and 0.47 mmol of DME were released upon grafting (0.70 (tBuO)<sub>3</sub>SiOH/W<sub>surf</sub> and 0.40 DME/W<sub>surf</sub>). Additional 0.65 mmol of DME were quantified in the volatiles collected upon high vacuum drying, indicating that >95% of DME was not retained on the silica surface.

Elemental Analysis: W 3.12%, H 0.64%, C 2.97% corresponding to 14.5 C/W (12 expected), 38 H/W 39 expected).

IR (KBr,  $\text{cm}^{-1}$ ): 1369 (s), 1393 (m), 1474 (w), 2937 (m, sh), 2979 (s).

IR and solid state NMR spectra of the material are given in Fig. S3 and Fig. S8-Fig. S9, respectively.

**Thermal decomposition of  $[(\equiv\text{SiO})\text{WO}_2(\text{OSi}(\text{OtBu})_3)]$ : preparation of **1****

$[(\equiv\text{SiO})\text{WO}_2(\text{OSi}(\text{OtBu})_3)]$  (3.0 g) was loaded into a reactor and placed under high vacuum ( $10^{-5}$  mbar) and heated to 200 °C (1 °C/min) and held at this temperature for 3 h then heated at 400 °C (1 °C/min) and held at this temperature for 6 h . The reactor was cooled to ambient temperature under vacuum, and **1** was stored in an Ar filled glovebox. The volatiles evolved during this process were quantified by  $^1\text{H}$  NMR in  $\text{C}_6\text{D}_6$  using ferrocene as an internal standard, indicating the release of 2.5 equiv. of isobutylene, 0.6 equiv. of water and 0.8 equiv. of tBuOH per surface W complex.

Elemental analysis: W 3.15 %.

IR (KBr,  $\text{cm}^{-1}$ ): 3746 (s).

IR spectrum, UV-DRS and powder XRD pattern of the material are given in Fig. S3, Fig. S17 and Fig. S19, respectively.

### 3) Reductions of 1

Acronyms:

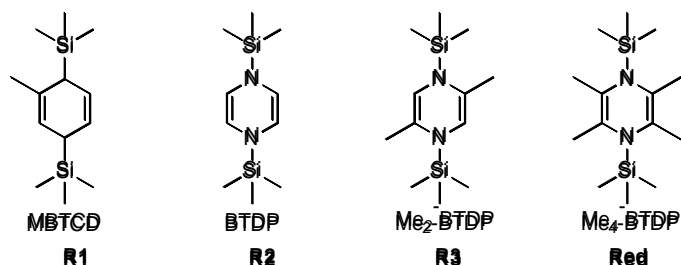

#### Representative procedure: Preparation of 1-(Red)<sub>2</sub>

A solution of 5.4 mg of Me<sub>4</sub>-BTDP (19.4 μmol, 1 equiv.) in benzene (0.5 mL) was added to a suspension of **1** (50 mg, 9.7 μmol) in benzene (0.5 mL) at room temperature. The suspension was slowly stirred at 70 °C for 12 h, resulting in color change of the material from colorless to dark violet. The solid was collected by filtration, and was washed by four suspension/filtration cycles in benzene (4 x 1 mL). The resulting dark violet solid was dried thoroughly under high vacuum (10<sup>-5</sup> mbar) at room temperature for 3 h to afford 45 mg of the title compound. All the filtrate solutions were collected and analyzed by <sup>1</sup>H NMR spectroscopy in C<sub>6</sub>D<sub>6</sub> using ferrocene as internal standard, indicating consumption of 13.1 μmol of Me<sub>4</sub>-BTDP and that 9.7 μmol of 2,3,5,6-tetramethylpyrazine and 1.2 μmol of HMDSO were released upon reacting (0.18 equiv. 2,3,5,6-tetramethylpyrazine /W<sub>surf</sub>). Elemental Analysis: W 2.93 %, C 2.57 %, H 0.54%, N 0.24 % corresponding to 13 C/W, 33 H/W and 1 N/W.

IR, UV-DRS and solid state NMR spectra of the material are given in Fig. S5, Fig. S18, and Fig. S10-Fig. S11, respectively.

#### Reduction of 1 with 1 equiv. of reductant R1, R2, R3 or Red

General reaction scheme:

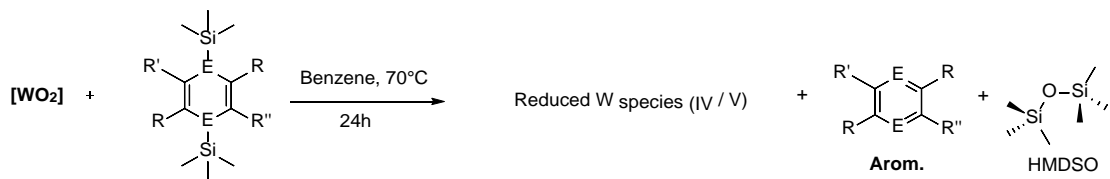

Reductions were carried out following the procedure above on 100 mg of **1** with 1 equiv. of the four reductants represented above. Analyses of the filtrate by NMR are summarized in Table S1, and IR spectra of the materials are given in Fig. S4.

**Table S1:** Filtrate analysis by <sup>1</sup>H NMR after reduction.

| Reductant  | Consumption of reductant <sup>a</sup> | Aromatized Bp (Arom.) <sup>a</sup> | HMDSO <sup>a</sup> | Colour of the material | Material name              |
|------------|---------------------------------------|------------------------------------|--------------------|------------------------|----------------------------|
| <b>R1</b>  | 10%                                   | 10%                                | 1%                 | Blue                   | <b>1-(R1)<sub>1</sub></b>  |
| <b>R2</b>  | 100%                                  | 1%                                 | 2%                 | Dark violet            | <b>1-(R2)<sub>1</sub></b>  |
| <b>R3</b>  | 100%                                  | 33%                                | 4%                 | Dark violet            | <b>1-(R3)<sub>1</sub></b>  |
| <b>Red</b> | 100%                                  | 55%                                | 3%                 | Dark violet            | <b>1-(Red)<sub>1</sub></b> |

<sup>a</sup> Values given in % with respect to the amount of reductant used in the reduction.

#### Reduction of **1** with 0.5-3 equiv. of reductant Me<sub>4</sub>-BTDP:

Reductions were carried out following the procedure above on 100 mg of **1** with various amounts of reductant Me<sub>4</sub>-BTDP. Analyses of the filtrate by NMR are summarized in Table S2 and IR spectra of the materials are given in Fig. S5.

**Table S2:** Filtrate analysis by <sup>1</sup>H NMR after reduction with various amount Me<sub>4</sub>-BTDP.

| Equiv. of Me <sub>4</sub> -BTDP per W center | Consumption of Me <sub>4</sub> -BTDP <sup>a</sup> | Aromatized Bp (Arom.) <sup>a</sup> | HMDSO <sup>a</sup> | Material name                |
|----------------------------------------------|---------------------------------------------------|------------------------------------|--------------------|------------------------------|
| <b>0.5</b>                                   | 100%                                              | 29%                                | 3%                 | <b>1-(Red)<sub>0.5</sub></b> |
| <b>1</b>                                     | 100%                                              | 55%                                | 3%                 | <b>1-(Red)<sub>1</sub></b>   |
| <b>2</b>                                     | 68%                                               | 50%                                | 6%                 | <b>1-(Red)<sub>2</sub></b>   |
| <b>3</b>                                     | 62%                                               | 29%                                | 4%                 | <b>1-(Red)<sub>3</sub></b>   |

<sup>a</sup> Values given in % with respect to the amount of reductant used in the reduction.

#### Passivation of SiO<sub>2-700</sub> with Me<sub>4</sub>-BTDP

A solution of 3.7 mg of Me<sub>4</sub>-BTDP (13 μmol, 1 equiv.) in benzene (0.5 mL) was added to a suspension of SiO<sub>2-700</sub> (50 mg, 19 μmol) in benzene (0.5 mL) at room temperature. The suspension was slowly stirred at 70 °C for 12 h. The solid was collected by filtration, and was washed by four suspension/filtration cycles in benzene (4 x 1 mL). The resulting solid was dried thoroughly under high vacuum (10<sup>-5</sup> mbar) at room temperature for 3 h. All the filtrate solutions were collected and analyzed by <sup>1</sup>H NMR spectroscopy in C<sub>6</sub>D<sub>6</sub> using ferrocene as internal standard, indicating consumption of 0.8 equiv. of Me<sub>4</sub>-BTDP and that 0.5 equiv. 2,3,5,6-tetramethylpyrazine was released upon reacting (together with other unidentified products). IR spectrum of the material is given in Fig. S6.

### Reaction of **1** with HMDSO

Hexamethyldisiloxane (7.6  $\mu\text{L}$ , 35  $\mu\text{mol}$ , 4 equiv) was added to a suspension of **1** (55 mg, 9  $\mu\text{mol}$ ) in 1 mL  $\text{C}_6\text{D}_6$ . The suspension was slowly stirred at 70  $^\circ\text{C}$  for 12 h. The solid was collected by filtration, and washed by three suspension/filtration cycles in  $\text{C}_6\text{D}_6$  (3 x 0.5 mL). The resulting solid was dried thoroughly under high vacuum (10<sup>-5</sup> mbar) at room temperature for 2 h. All the filtrate solutions were collected and analyzed by  $^1\text{H}$  NMR spectroscopy in  $\text{C}_6\text{D}_6$  using ferrocene as internal standard, indicating consumption of 41% (14  $\mu\text{mol}$ ) of HMDSO. The intensity of isolated SiOH in the IR decreased by 22% and a broad peak is observed ca. 3600  $\text{cm}^{-1}$ . IR spectrum of the material is given in Fig. S7.

## C) Single crystal XRD structures

CCDC 1479019 and 1479020 contains the supplementary crystallographic data

**Fig. S1:** Thermal ellipsoid plot at the 50% probability of  $[\text{WO}_2(\text{OSi}(\text{OtBu})_3)_2(\text{DME})]$ . Hydrogen atoms have been omitted and only one of the three independent molecules in the asymmetric unit have been represented for clarity.

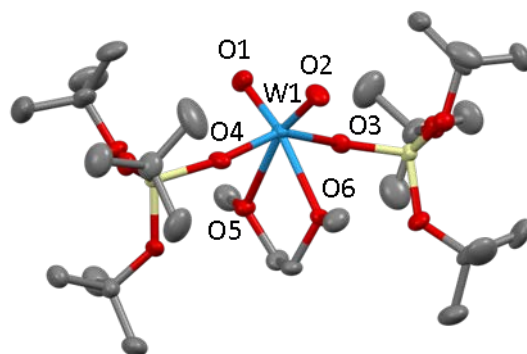

**Table S3:** Selected bonds for  $[\text{WO}_2(\text{OSi}(\text{OtBu})_3)_2(\text{DME})]$  (distances are given in Å)

| Structural parameters | $[\text{WO}_2(\text{OSi}(\text{OtBu})_3)_2(\text{DME})]$ |
|-----------------------|----------------------------------------------------------|
| W1 – O1               | 1.719(5)                                                 |
| W1 – O2               | 1.716(5)                                                 |
| W1 – O3               | 1.924(4)                                                 |
| W1 – O4               | 1.928(4)                                                 |
| W1 – O5               | 2.332(4)                                                 |
| W1 – O6               | 2.344(4)                                                 |

**Table S4:** Crystallographic data for  $[\text{WO}_2(\text{OSi}(\text{OtBu})_3)_2(\text{DME})]$

|                          |                                                                  |
|--------------------------|------------------------------------------------------------------|
| Formula                  | $\text{C}_{119}\text{H}_{264}\text{O}_{48}\text{Si}_8\text{W}_4$ |
| Crystal size (mm)        | $0.7 \times 0.2 \times 0.2$                                      |
| cryst syst               | Tetragonal                                                       |
| space group              | $I41$                                                            |
| volume (Å <sup>3</sup> ) | 16779.5(4)                                                       |
| $a$ (Å)                  | 23.6586(3)                                                       |



|                                                  |                                  |
|--------------------------------------------------|----------------------------------|
| $b$ (Å)                                          | 23.6586(3)                       |
| $c$ (Å)                                          | 29.9778(5)                       |
| $\alpha$ (deg)                                   | 90                               |
| $\beta$ (deg)                                    | 90                               |
| $\gamma$ (deg)                                   | 90                               |
| $Z$                                              | 4                                |
| formula weight (g/mol)                           | 3423.44                          |
| density (g cm <sup>-3</sup> )                    | 1.355                            |
| F(000)                                           | 7075.3                           |
| temp (K)                                         | 150.0(3)                         |
| total no. reflections                            | 30830                            |
| unique reflections [R(int)]                      | 23689 [0.1046]                   |
| Final R indices [ $I > 2\sigma(I)$ ]             | $R_1 = 0.0641$ , $wR_2 = 0.1208$ |
| Largest diff. peak and hole (e.Å <sup>-3</sup> ) | 2.62/-3.91                       |
| GOF                                              | 1.050                            |

**Fig. S2:** Thermal ellipsoid plot at the 50% probability of [WO(OSi(OtBu)<sub>3</sub>)<sub>4</sub>]. Hydrogen atoms have been omitted for clarity.

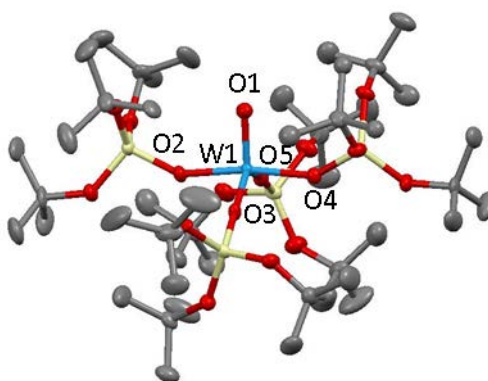

**Table S5:** Selected bonds for [WO(OSi(OtBu)<sub>3</sub>)<sub>4</sub>] (distances are given in Å)

| Structural parameters | [WO(OSi(OtBu) <sub>3</sub> ) <sub>4</sub> ] |
|-----------------------|---------------------------------------------|
| W1 – O1               | 1.682(4)                                    |
| W1 – O2               | 1.897(4)                                    |
| W1 – O3               | 1.857(5)                                    |

|         |          |
|---------|----------|
| W1 – O4 | 1.905(4) |
| W1 – O5 | 1.856(4) |

**Table S6:** Crystallographic data for [WO(OSi(OtBu)<sub>3</sub>)<sub>4</sub>]

|                                                  |                                                                    |
|--------------------------------------------------|--------------------------------------------------------------------|
| Formula                                          | C <sub>48</sub> H <sub>108</sub> O <sub>17</sub> Si <sub>4</sub> W |
| Crystal size (mm)                                | 0.4 × 0.33 × 0.21                                                  |
| cryst syst                                       | Monoclinic                                                         |
| space group                                      | <i>C2/c</i>                                                        |
| volume (Å <sup>3</sup> )                         | 16779.5(4)                                                         |
| <i>a</i> (Å)                                     | 26.1638(10)                                                        |
| <i>b</i> (Å)                                     | 13.7832(5)                                                         |
| <i>c</i> (Å)                                     | 36.0594(14)                                                        |
| <i>α</i> (deg)                                   | 90                                                                 |
| <i>β</i> (deg)                                   | 91.306(4)                                                          |
| <i>γ</i> (deg)                                   | 90                                                                 |
| Z                                                | 8                                                                  |
| formula weight (g/mol)                           | 1253.55                                                            |
| density (g cm <sup>-3</sup> )                    | 1.281                                                              |
| F(000)                                           | 5296.0                                                             |
| temp (K)                                         | 150.0(3)                                                           |
| total no. reflections                            | 88239                                                              |
| unique reflections [R(int)]                      | 13807[R(int) = 0.1303]                                             |
| Final R indices [ <i>I</i> > 2σ( <i>I</i> )]     | <i>R</i> <sub>1</sub> = 0.0766, <i>wR</i> <sub>2</sub> = 0.1187    |
| Largest diff. peak and hole (e.Å <sup>-3</sup> ) | 3.10/-2.92                                                         |
| GOF                                              | 1.273                                                              |

## D) IR

**Fig. S3:** FTIR transmission spectra of **1** (red line) compared with the parent  $[(\equiv\text{SiO})\text{WO}_2(\text{OSi}(\text{OtBu})_3)]$  complex (pink line) and  $\text{SiO}_{2-700}$  (blue line).

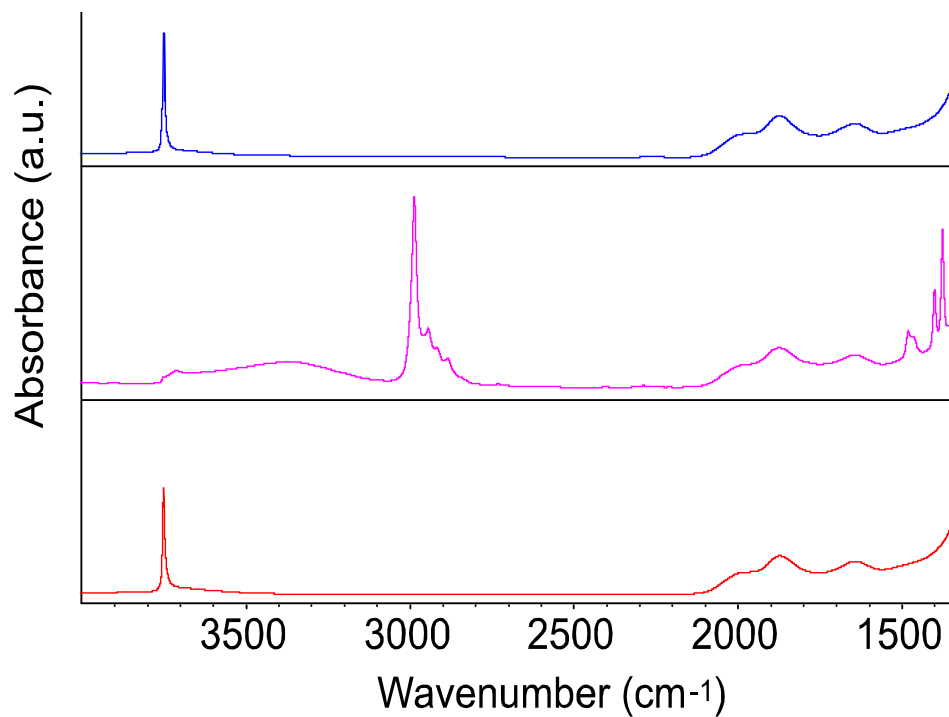

**Fig. S4:** FTIR of the materials **1-(R1)<sub>1</sub>**, (red line), **1-(R2)<sub>1</sub>**, (blue line), **1-(R3)<sub>1</sub>**, (green line), and **1-(Red)<sub>1</sub>**, (purple line).

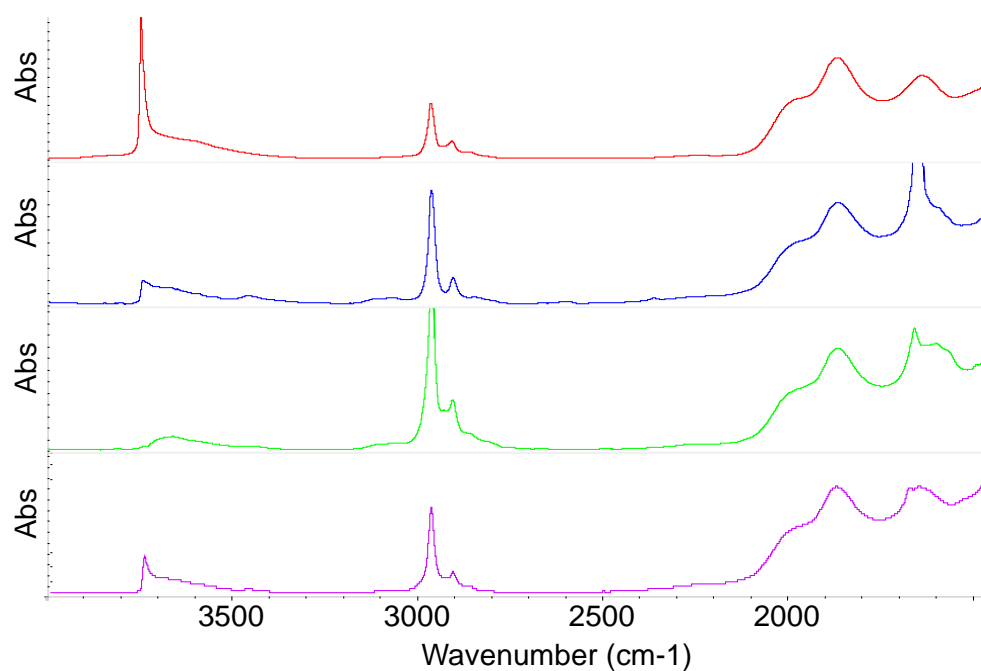

**Fig. S5:** FTIR of the materials **1-(Red)<sub>0.5</sub>**, (blue line), **1-(Red)<sub>1</sub>**, (light green line), **1-(Red)<sub>2</sub>**, (red line), and **1-(Red)<sub>3</sub>**, (dark green line).

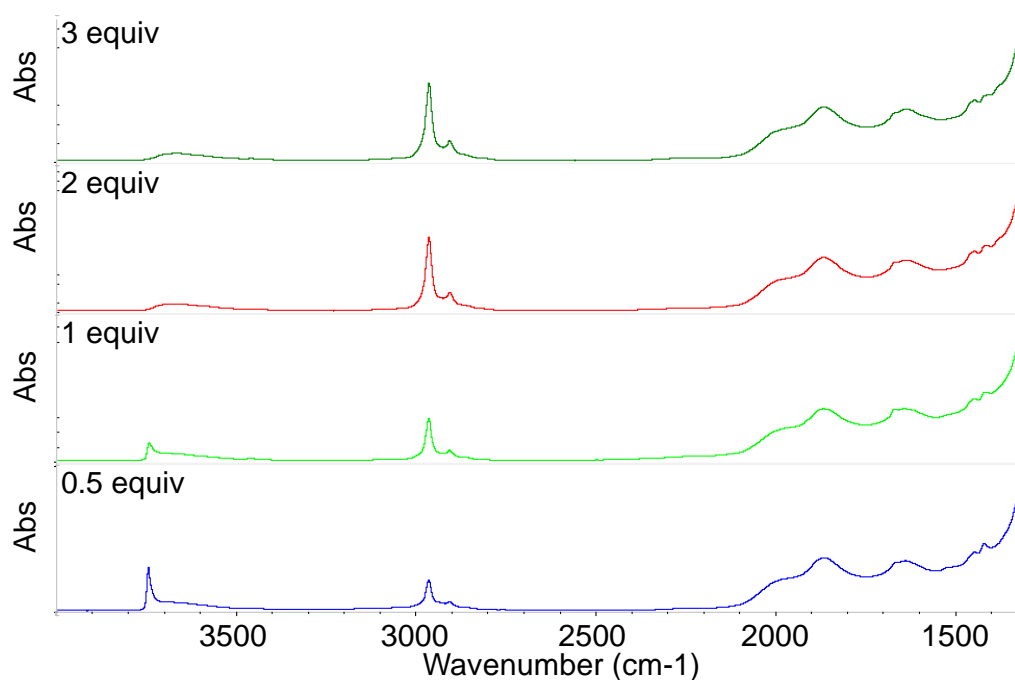

**Fig. S6:** FTIR of the SiO<sub>2-700</sub> before (red line) and after (blue line) passivation with one equiv. of Me<sub>4</sub>-BTDP (procedure described above).

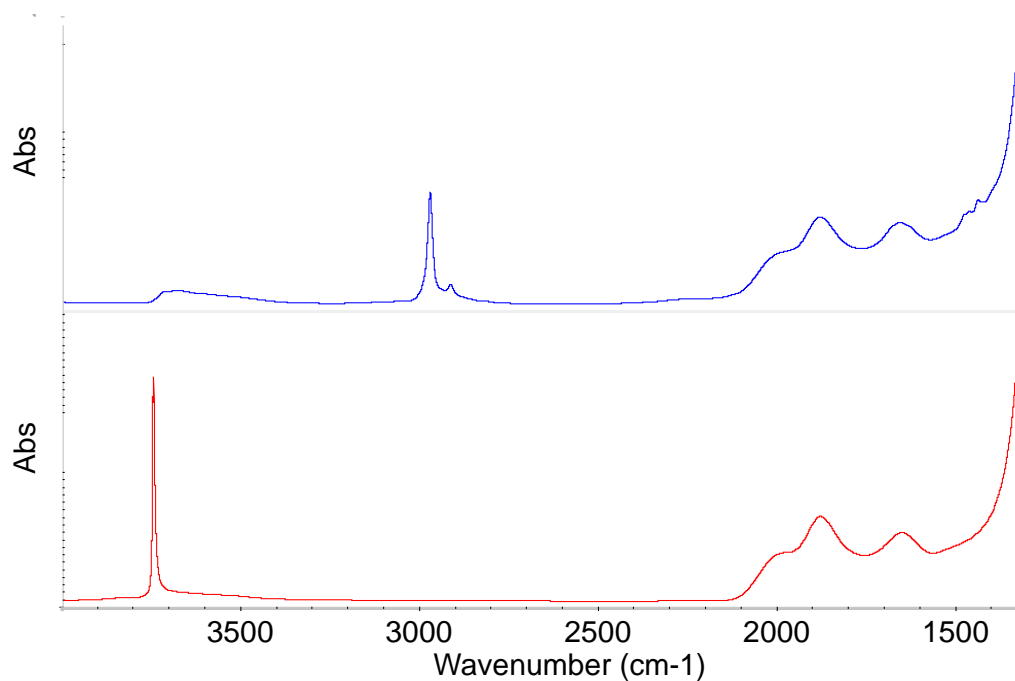

**Fig. S7:** FTIR of **1** before (red line) and after (blue line) reaction with 4 equiv. HMDSO (procedure described above).

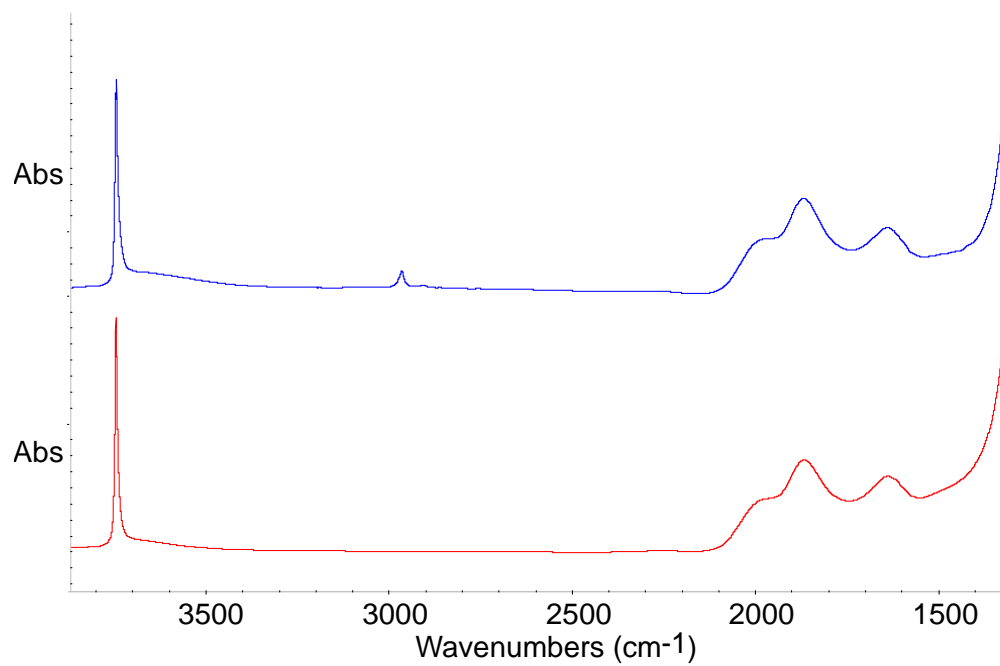

## E) Solid State NMR

**Fig. S8:**  $^1\text{H}$  NMR spectrum (400 MHz, spinning rate 10 kHz, 4 mm rotor) of  $[(\equiv\text{SiO})\text{WO}_2(\text{OSi}(\text{OtBu})_3)]$ .

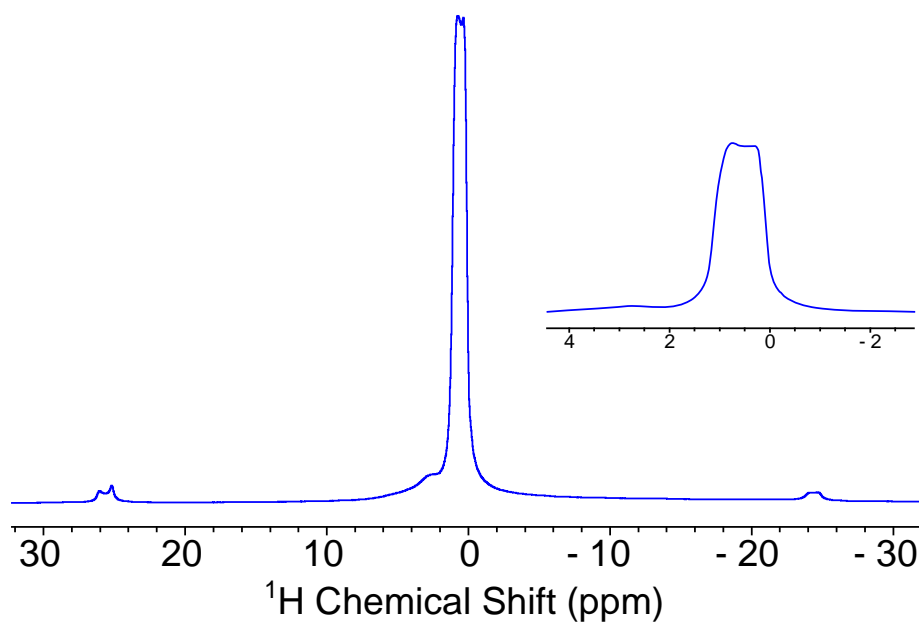

**Fig. S9:**  $^{13}\text{C}$  CP-MAS NMR spectrum (400 MHz, spinning rate 10 kHz, 4 mm rotor) of  $[(\equiv\text{SiO})\text{WO}_2(\text{OSi}(\text{OtBu})_3)]$  ( $d_1 = 2$  s, contact time = 2 ms).

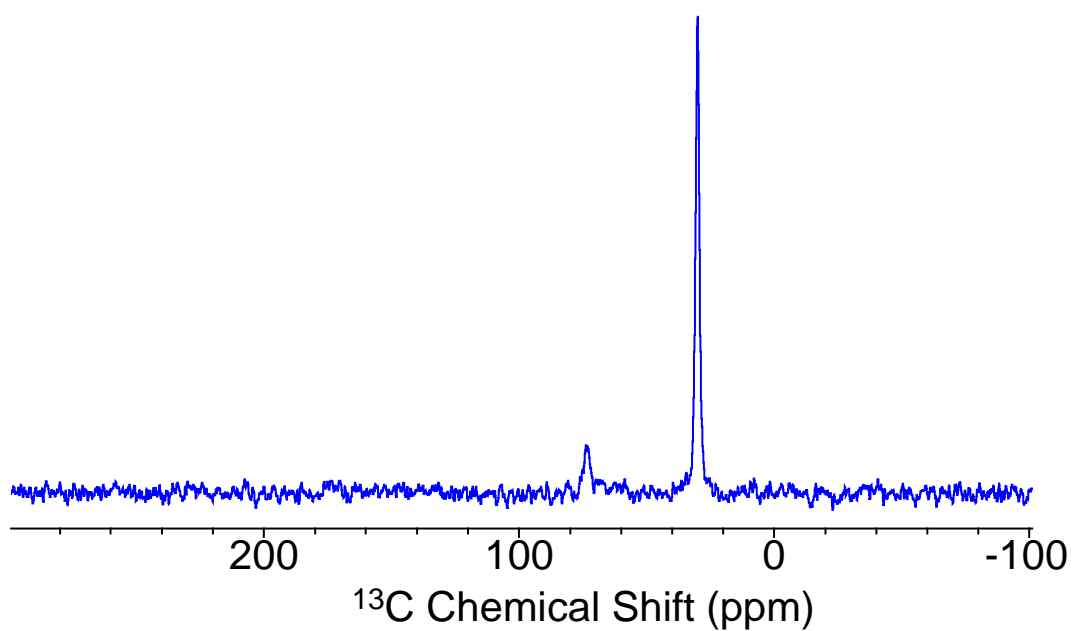

**Fig. S10:**  $^1\text{H}$  NMR spectrum (400 MHz, spinning rate 10 kHz, 4 mm rotor) of **1-(Red)<sub>2</sub>**.

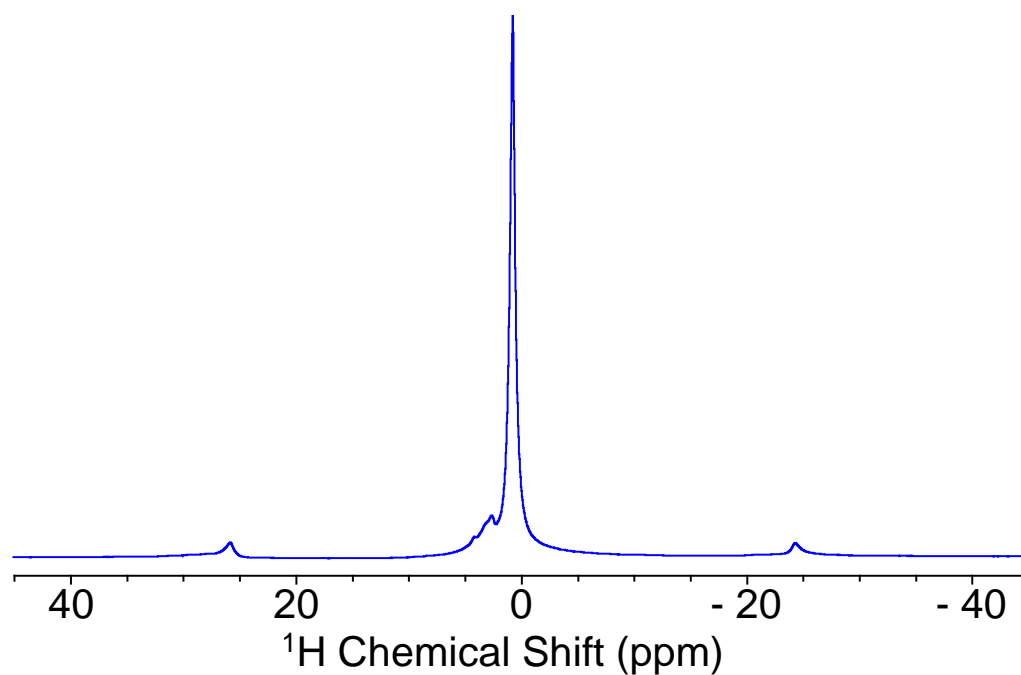

**Fig. S11:**  $^{13}\text{C}$  CP-MAS NMR spectrum (400 MHz, spinning rate 10 kHz, 4 mm rotor) of **1-(Red)<sub>2</sub>** (d1 = 2 s, contact time = 2 ms).

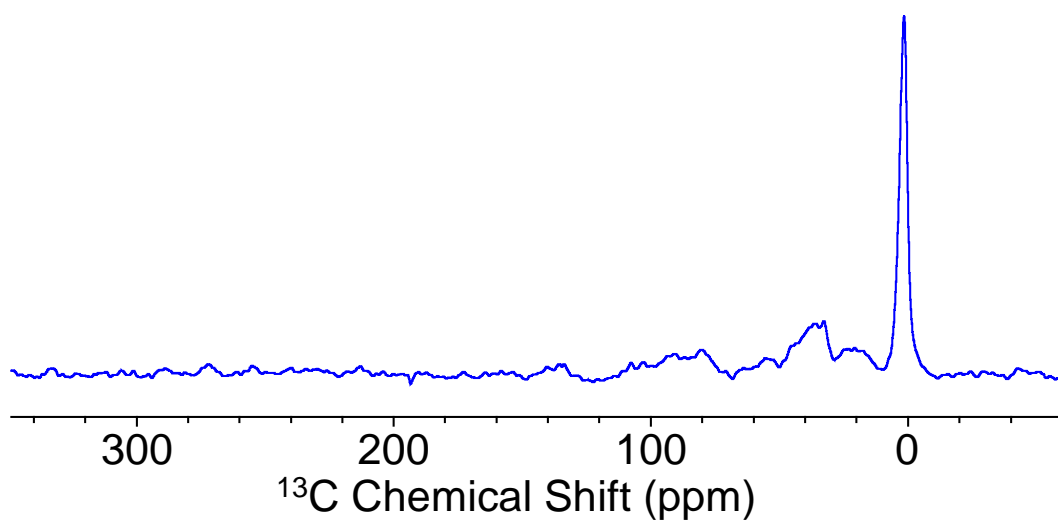

**Fig. S12:**  $^1\text{H}$  NMR spectrum (400 MHz, spinning rate 10 kHz, 4 mm rotor) of **1-(Red)<sub>2</sub>** after exposure to  $^{13}\text{C}$  dilabeled ethylene (see details in part “N”).

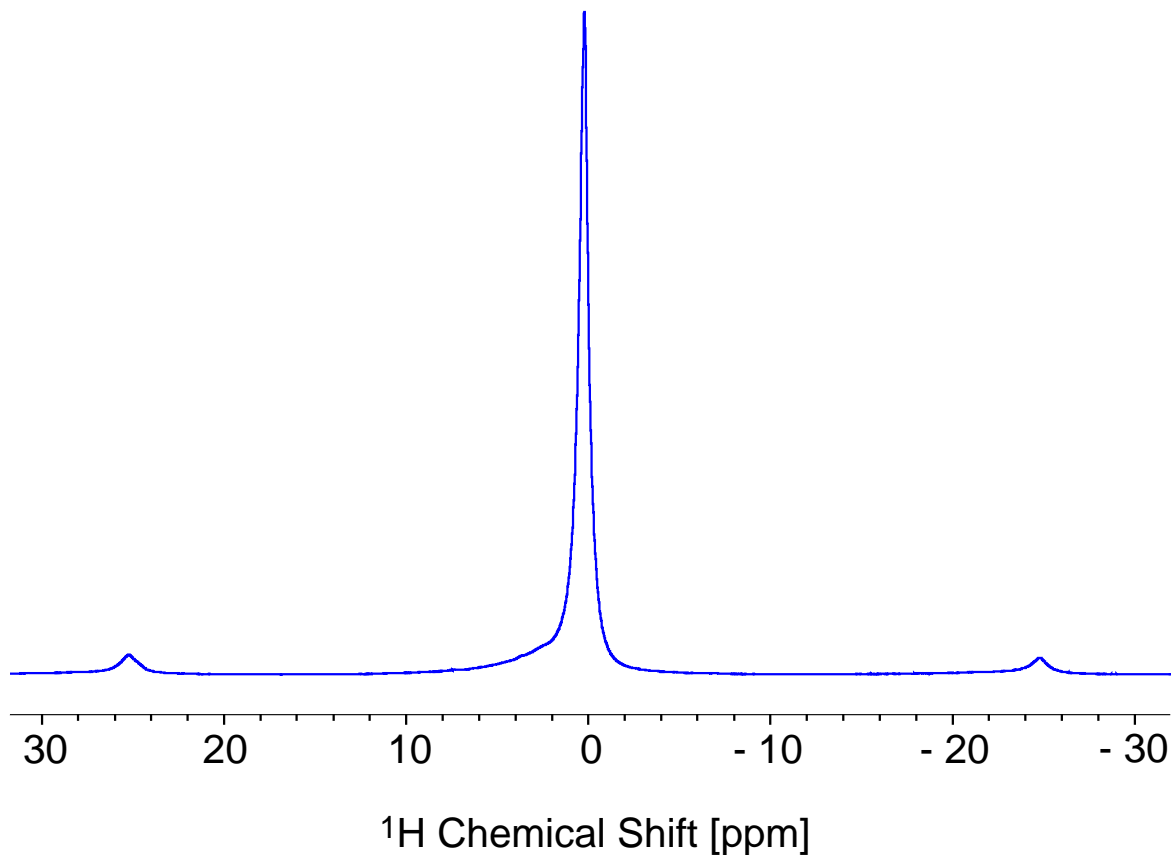

**Fig. S13:**  $^{13}\text{C}$  CP-MAS NMR spectrum (400 MHz, spinning rate 10 kHz, 4 mm rotor) of **1-(Red)<sub>2</sub>** after exposure to  $^{13}\text{C}$  dilabeled ethylene (d1 = 2 s, contact time = 2 ms).

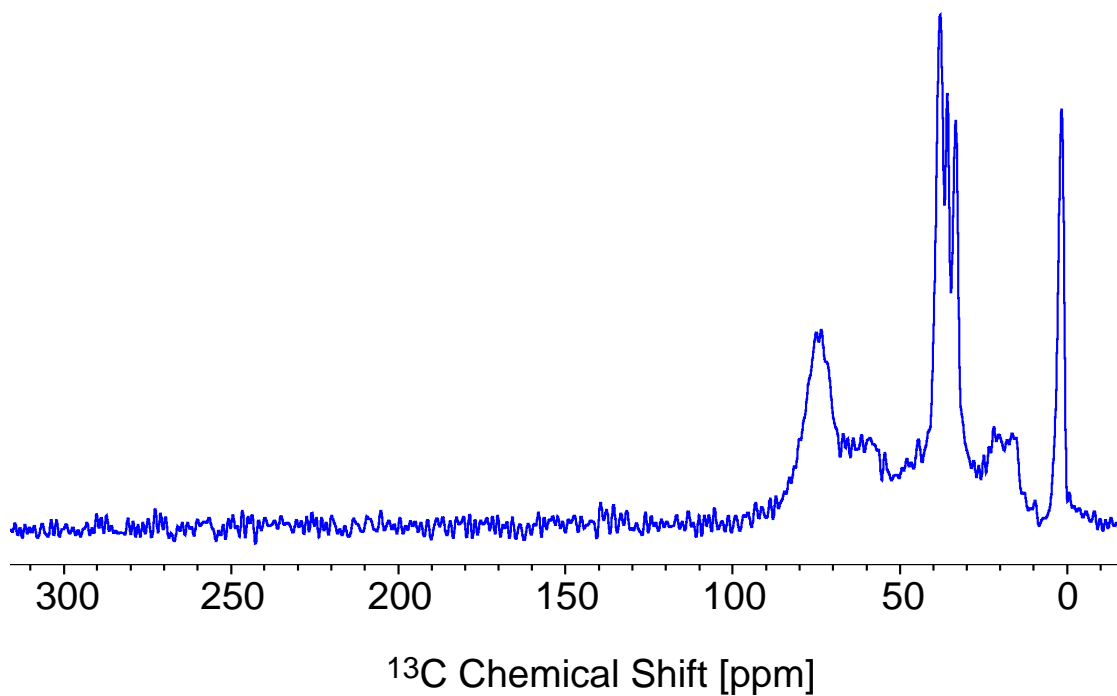



**Fig. S14:** HETCOR spectrum (400 MHz, spinning rate 10 kHz, 4 mm rotor) of **1-(Red)<sub>2</sub>** of **1-(Red)<sub>2</sub>** after exposure to <sup>13</sup>C dilabeled ethylene.

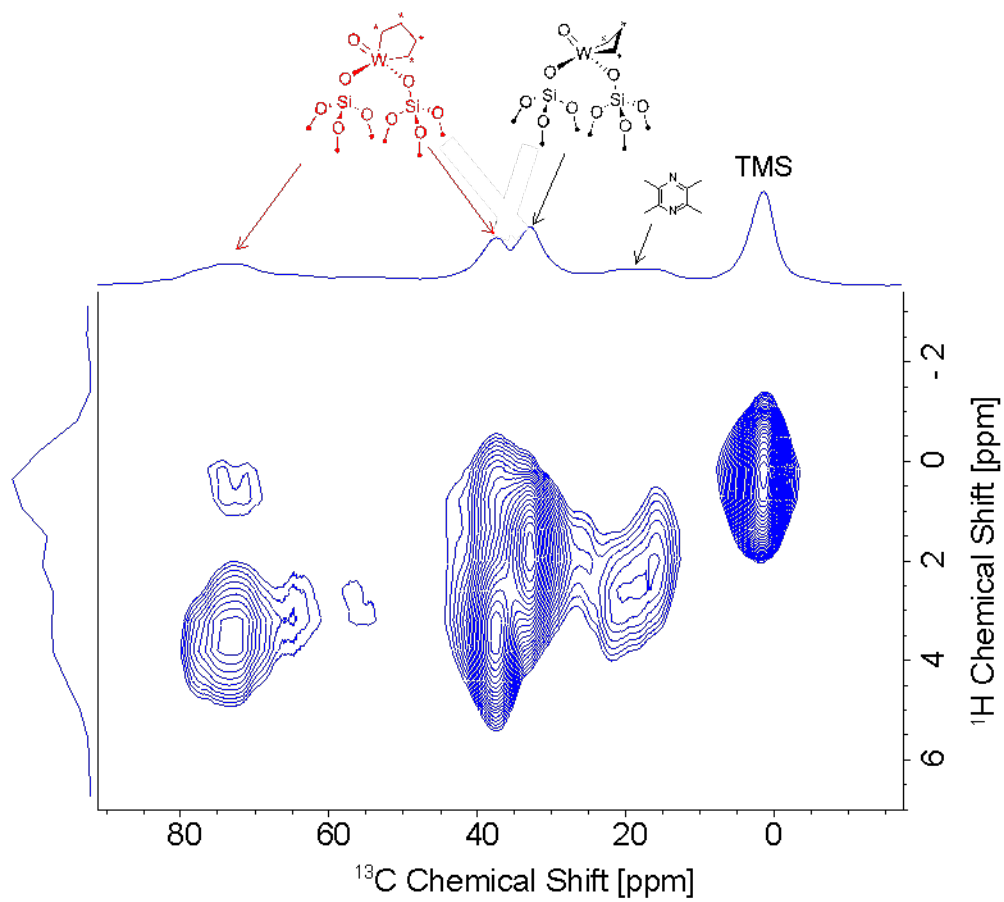

**Fig. S15:**  $^1\text{H}$  NMR spectrum (400 MHz, spinning rate 10 kHz, 4 mm rotor) of **1-(Red)<sub>2</sub>** after isotopic exchange (see details in part “N4”)

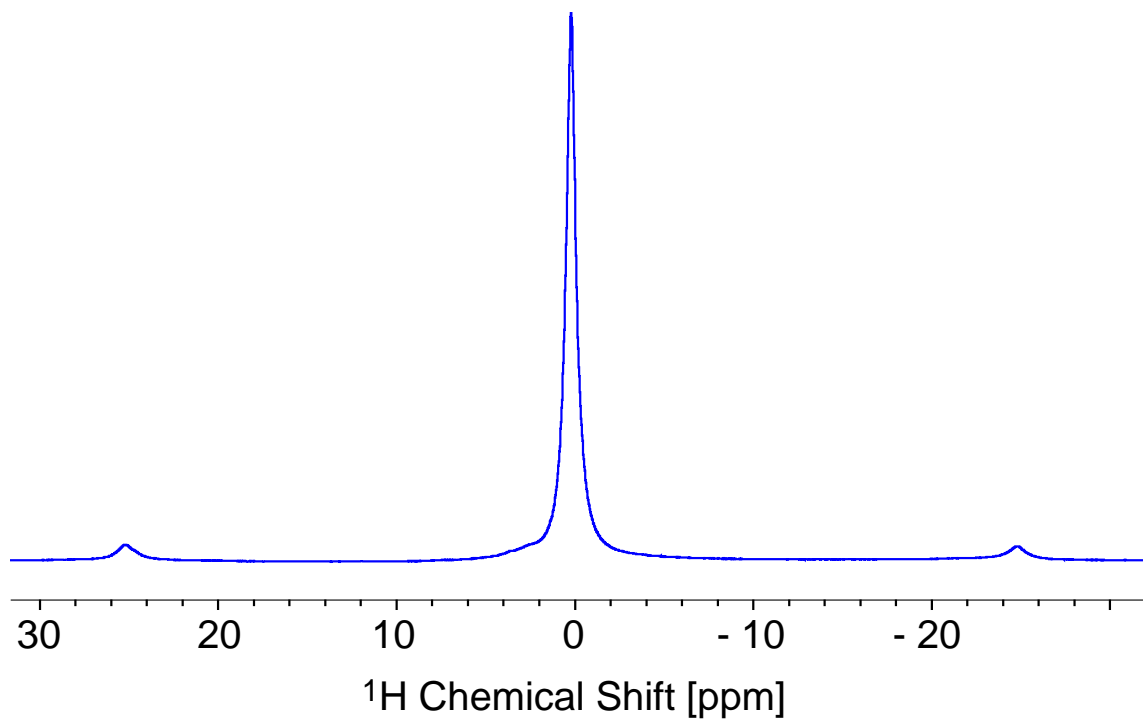

**Fig. S16:**  $^{13}\text{C}$  CP-MAS NMR spectrum (400 MHz, spinning rate 10 kHz, 4 mm rotor) of **1-(Red)<sub>2</sub>** after isotopic exchange (see details in part “N4” (d1 = 2 s, contact time = 2 ms)).

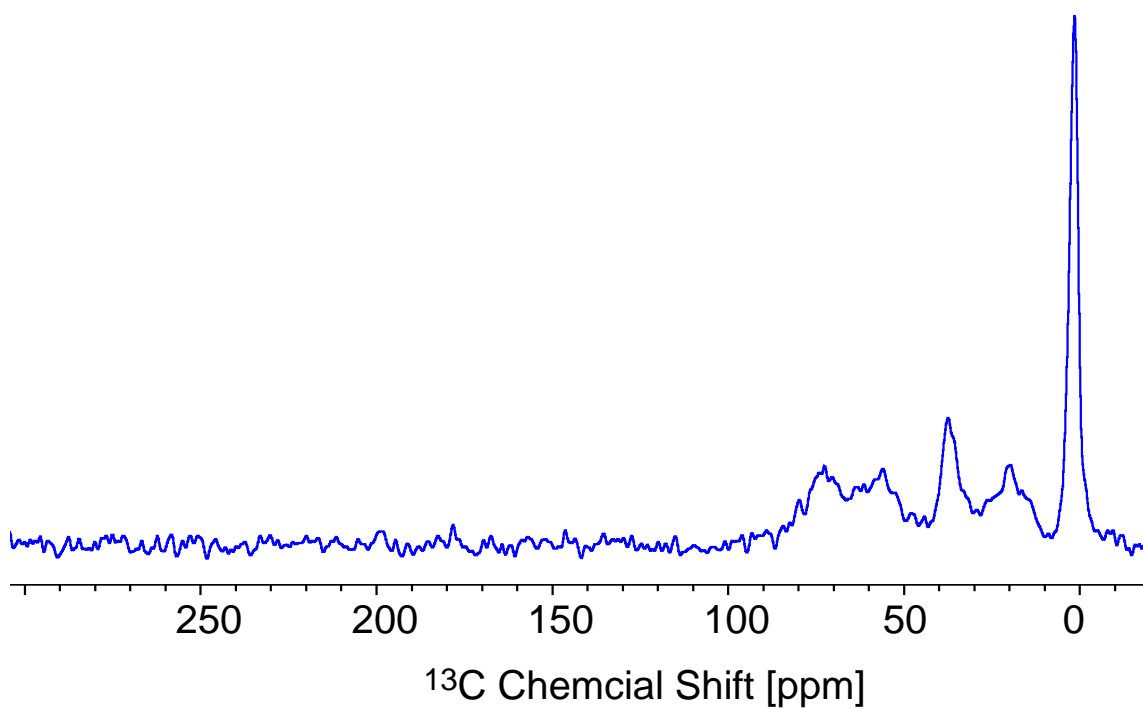

## F) UV-Vis DRS

**Fig. S17:** UV-vis DRS spectra and  $E_g$  values of **1**

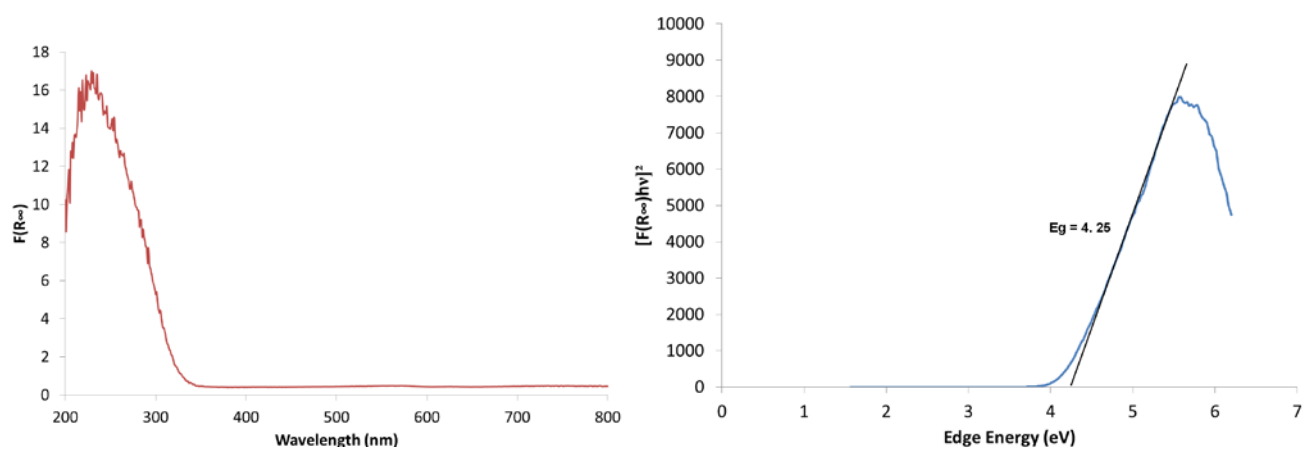

**Fig. S18:** UV-vis DRS spectrum of **1-(Red)<sub>2</sub>**

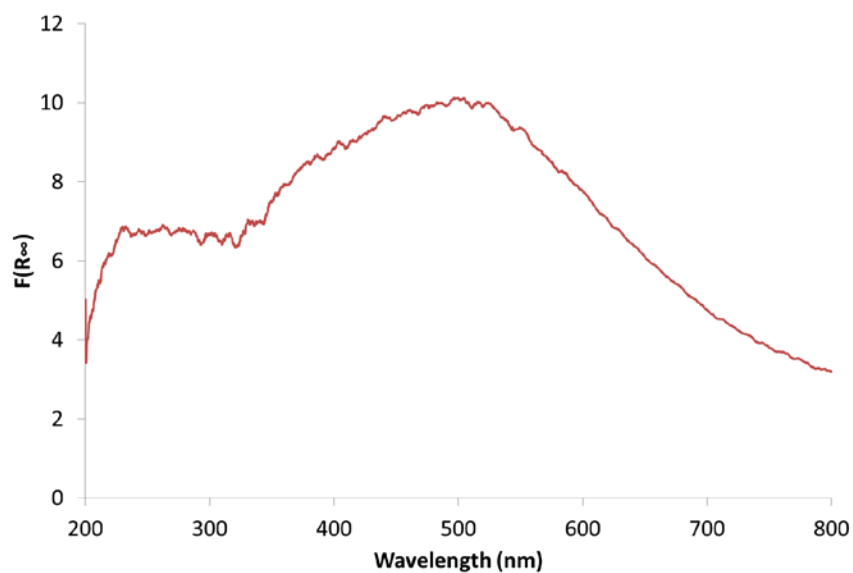

## G) Powder XRD

**Fig. S19:** Powder XRD pattern of **1**.

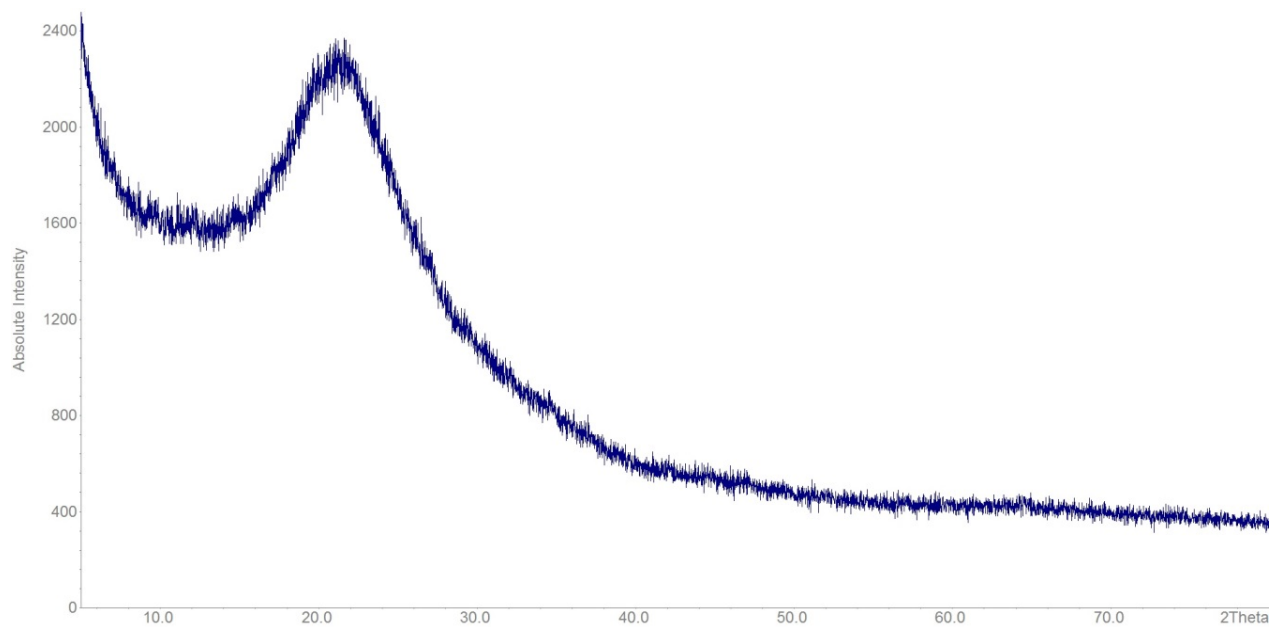

## H) XAS

### XAS characterisation of **1**

**Fig. S20:** Fit of **1** in k-space (top plot) and R-space (bottom plot).

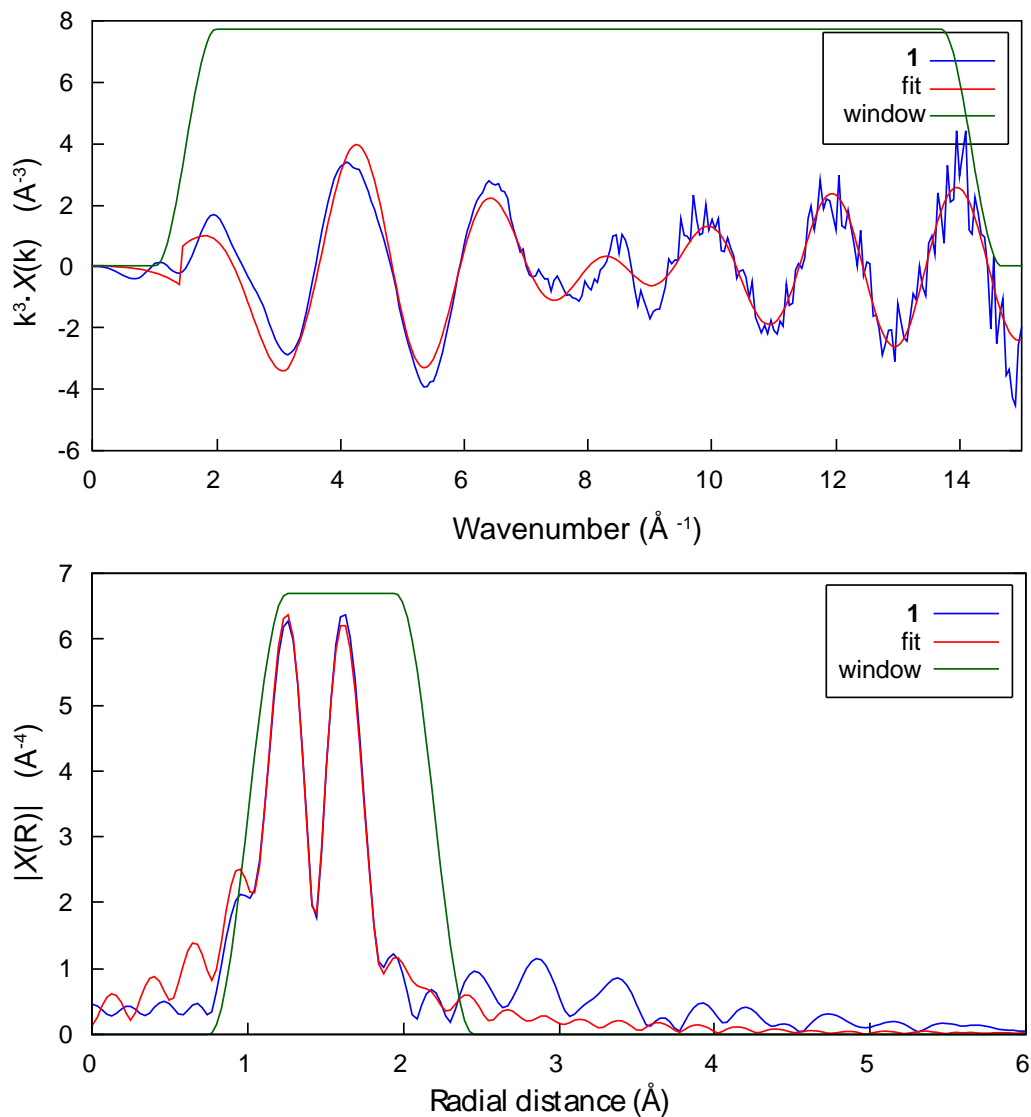

**Table S7: Scattering paths for **1**.**

| Scatterer | N             | S02   | $\sigma^2$ (Å <sup>2</sup> ) | $\Delta E_0$ (eV) | Delr             | Reff (Å) | R (Å)           |
|-----------|---------------|-------|------------------------------|-------------------|------------------|----------|-----------------|
| O (W=O)   | 1.52 +/- 0.09 | 0.94* | 0.00153*                     | 7.598             | -0.013 +/- 0.002 | 1.71730  | 1.704 +/- 0.002 |
| O (W—O)   | 2.9 +/- 0.1   | 0.94* | 0.00355*                     | 7.598             | -0.034 +/- 0.002 | 1.92630  | 1.892 +/- 0.002 |

\*Values fixed in the fit.

### XAS characterisation of $\text{WO}_3$

Fig. S21:  $L_{\text{III}}$ -edge EXAFS k-space (top plot) and R-space (bottom plot) of  $\text{WO}_3$ .

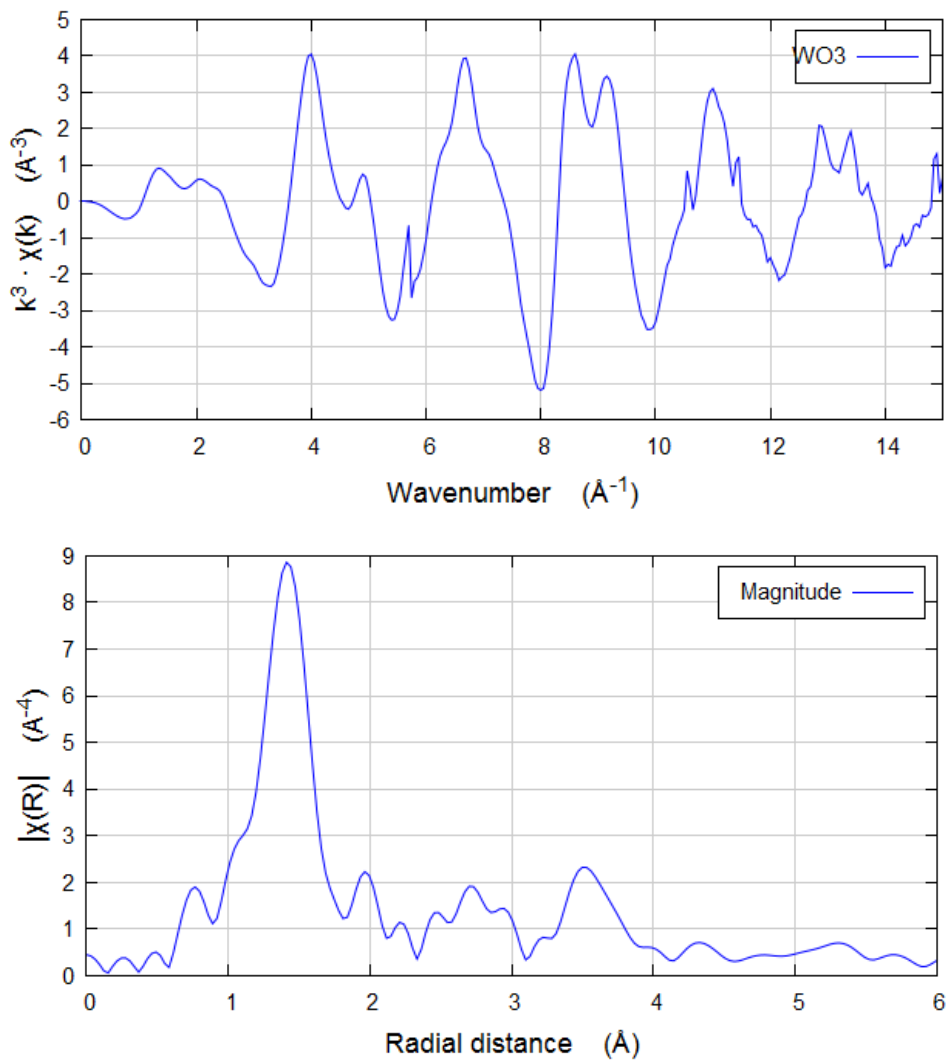

**XANES whteline energy****Table S8:** XANES whteline energy of reference samples and **1**, before and after reduction with various amount Me<sub>4</sub>-BTDP.

| Sample                                                          | Whiteline energy (eV) | Reference (synthesis) |
|-----------------------------------------------------------------|-----------------------|-----------------------|
| <b>1</b>                                                        | 10210,93              | This paper            |
| <b>1-(Red)<sub>0,5</sub></b>                                    | 10209,61              | This paper            |
| <b>1-(Red)<sub>1</sub></b>                                      | 10209,15              | This paper            |
| <b>1-(Red)<sub>2</sub></b>                                      | 10209,13              | This paper            |
| <b>1-(Red)<sub>3</sub></b>                                      | 10209,13              | This paper            |
| <b>[WO(OSi(OtBu)<sub>3</sub>)<sub>4</sub>]</b>                  | 10210.97              | 6                     |
| <b>[WO<sub>2</sub>(OSi(OtBu)<sub>3</sub>)<sub>2</sub>(DME)]</b> | 10210.87              | This paper            |
| <b>[(≡SiO)WO<sub>2</sub>(OSi(OtBu)<sub>3</sub>)]</b>            | 10210.90              | This paper            |
| <b>W(OEt)<sub>5</sub>/SiO<sub>2</sub></b>                       | 10209.53              | 7                     |

## EXAFS of the reduced species

**Fig. S22:** Fit of 1-(Red)<sub>2</sub> in k-space (top plot) and R-space (bottom plot).

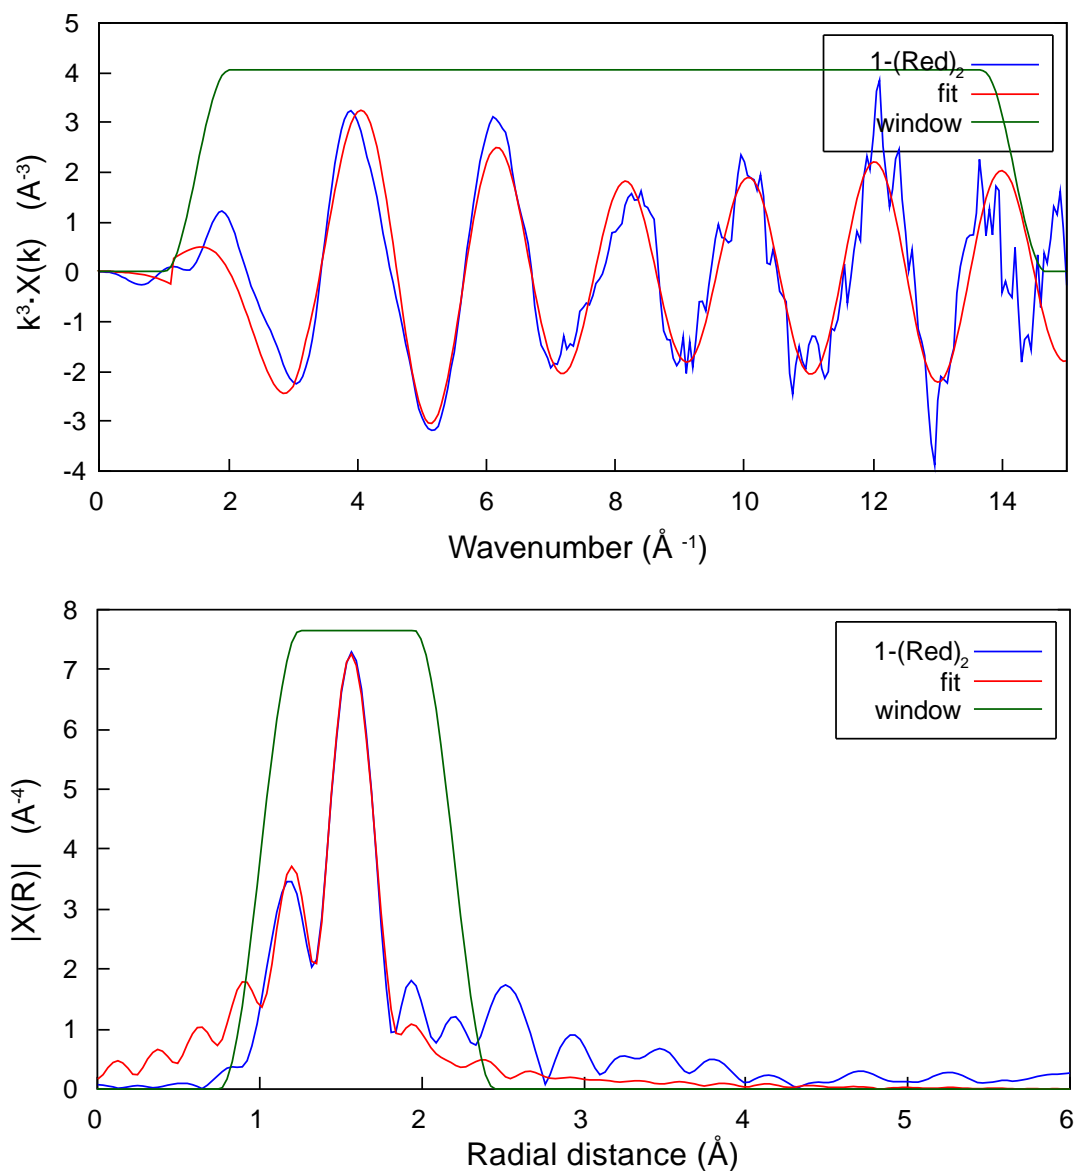

**Table S9: Scattering paths for 1-(Red)<sub>2</sub>.**

| Scatterer | N           | S02   | $\sigma^2$ ( $\text{\AA}^2$ ) | $\Delta E_0$ (eV) | Delr             | Reff ( $\text{\AA}$ ) | R ( $\text{\AA}$ ) |
|-----------|-------------|-------|-------------------------------|-------------------|------------------|-----------------------|--------------------|
| O (W=O)   | 0.8 +/- 0.2 | 0.94* | 0.00153*                      | 4.708             | -0.021 +/- 0.009 | 1.71730               | 1.696 +/- 0.009    |
| O (W—O)   | 3.1 +/- 0.2 | 0.94* | 0.00355*                      | 4.708             | -0.029 +/- 0.008 | 1.92630               | 1.898 +/- 0.008    |

\*Values fixed in the fit.



### XANES spectra

**Fig. S23:** W L<sub>3</sub> XANES spectra of **1** (blue line), [WO(OSi(OtBu)<sub>3</sub>)<sub>3</sub>]<sub>4</sub> (red line) and [WO<sub>2</sub>(OSi(OtBu)<sub>3</sub>)<sub>2</sub>(DME)] (green line) reference materials

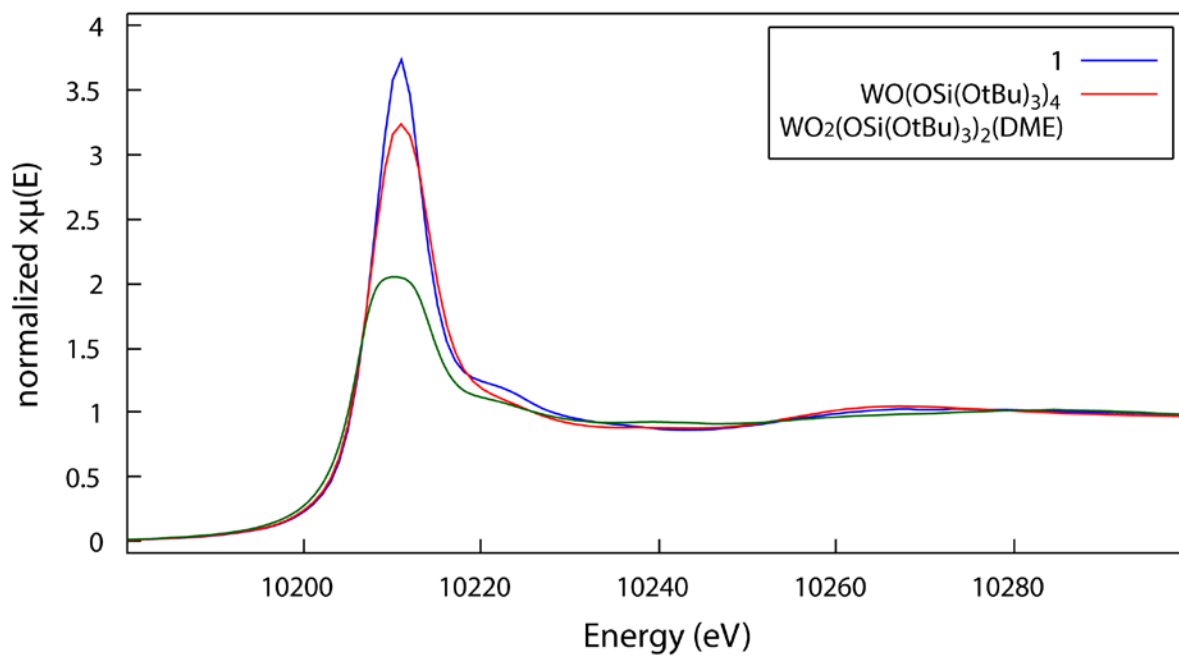

**Fig. S24:** W L<sub>3</sub> XANES spectra of **1** (blue line), **1-(Red)<sub>2</sub>** (red line), Na<sub>2</sub>WO<sub>4</sub> (green line), and WO<sub>2</sub> (purple line) reference materials

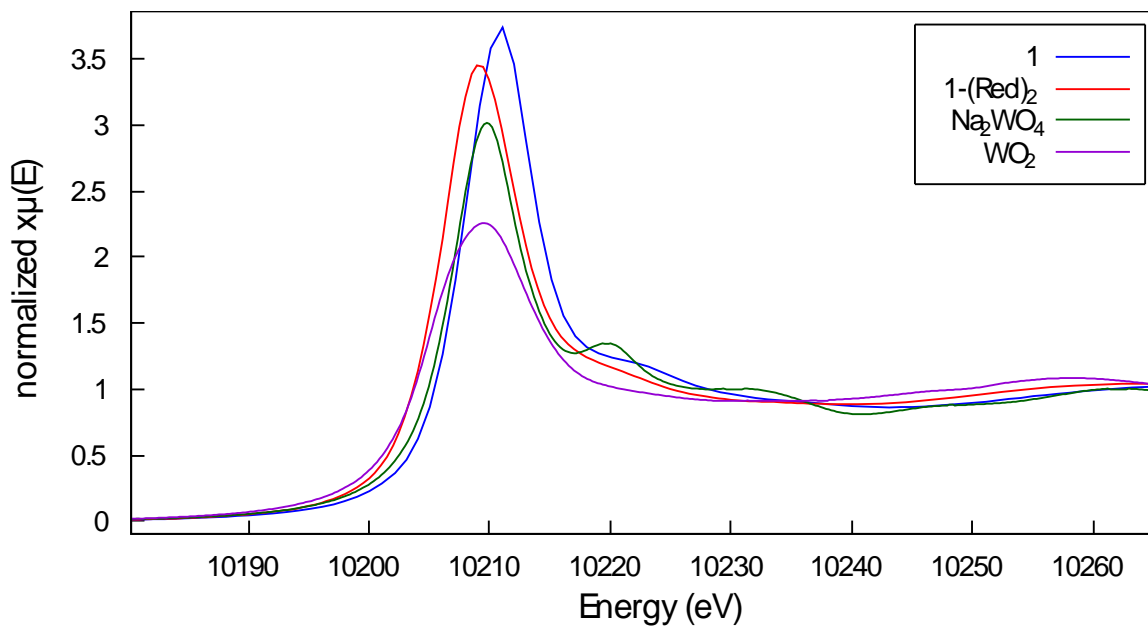

## I) EPR spectroscopy

All measurements were conducted at X band (9.5-GHz electron paramagnetic resonance (EPR) frequency) at 110 K. Attenuation was varied between 14-20 dB such that no saturation was observed.

### EPR of **1-(Red)<sub>2</sub>**

#### *Spin counting*

12.1 mg of the material **1-(Red)<sub>2</sub>** was introduced in a Suprasil Quartz EPR tube fitted with a J. Young valve under argon. This amount was chosen to ensure that the total sample height is about 1 cm. The amount of W(V) in the material was determined by double integration of the continuous wave EPR spectrum between 3451 and 4282 Gauss and referencing to a calibration curve of obtained using the W(V) standard  $\text{WOCl}_3(\text{bpy})$  (concentration range used for the calibration curve between 0.72 and 4.32 mM, in acetonitrile/ 2-methyltetrahydrofuran = 4:1). Additional correction of the difference in the incident microwave power was taken into account. Using this method, 0.33  $\mu\text{mol}$  of W(V) centers were determined to be present in the sample, indicating the presence of ca 15% of W(V) sites among all W centers in **1-(Red)<sub>2</sub>** (determined by elemental analysis).

This value was found constant among 2 measurements with different samples of **1-(Red)<sub>2</sub>**.

**Fig. S25:** EPR spectra of **1-(Red)<sub>2</sub>**

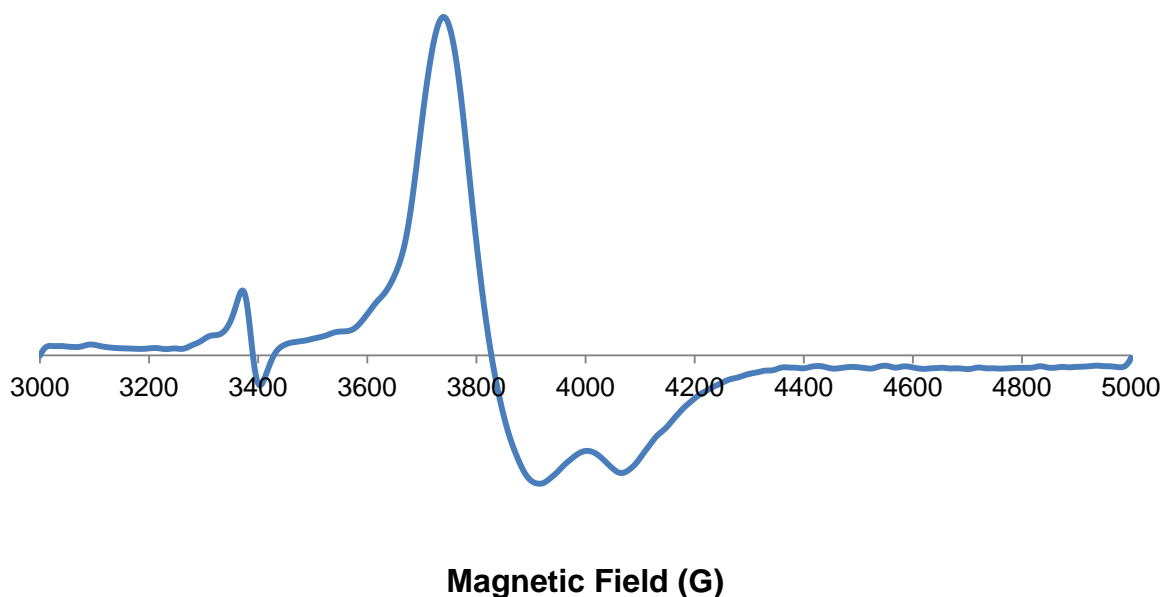

### EPR of 1-(Red)<sub>2</sub> before and after exposure to 10 equiv. of *cis*-4-nonene

12.1 mg of 1-(Red)<sub>2</sub> was loaded into a Suprasil quartz EPR tube fitted with a J. Young valve. EPR spectrum was initially measured, followed by the addition of 22  $\mu$ L of a 0.97 M solution of *cis*-4-nonene in toluene. The reaction mixture was heated at 70 °C for 6 h. The volatiles were removed under vacuum after reaction and EPR spectrum was measured again in same conditions (See Fig. S26).

**Fig. S26:** EPR spectra of 1-(Red)<sub>2</sub> before and after exposure to 10 equiv. of *cis*-4-nonene (Procedure described above) Note: Similar small sharp peak with g value 2.01 was reported to be O<sub>2</sub><sup>-</sup> radical in the WO<sub>3</sub>/Al<sub>2</sub>O<sub>3</sub> system)

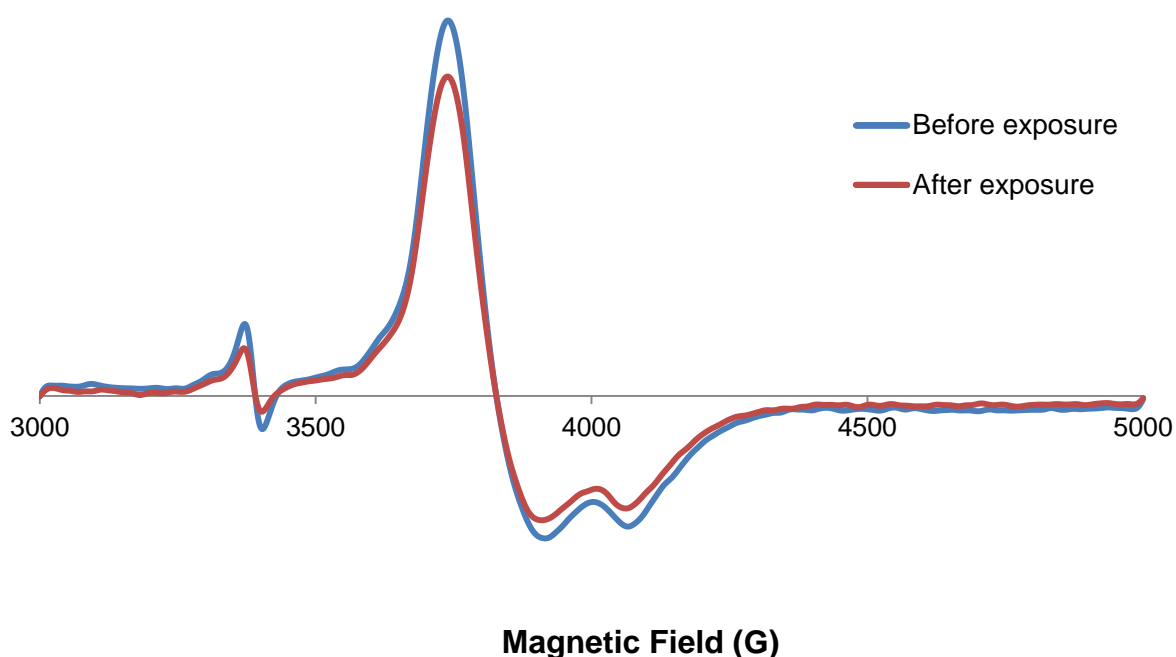

**Table S10:** g-values of the material before and after exposure to 10 equiv. of *cis*-4-nonene.

|                 | g1    | g2    | g3    |
|-----------------|-------|-------|-------|
| Before exposure | 2.014 | 1.777 | 1.674 |
| After exposure  | 2.012 | 1.777 | 1.681 |

## J) Titration of surface OH sites:

In an Ar filled glovebox, 30 mg of the supported catalyst were weighed into a Schlenk tube. A stock solution containing both ferrocene (internal standard, 0.075 mmol, 14 mg) and benzyl magnesium bromide (190  $\mu$ l, 0.19 mmol, 1 M solution in Et<sub>2</sub>O) in 3 ml of d<sub>6</sub>-benzene was prepared. 1 mL of this stock solution (0.063 mmol PhCH<sub>2</sub>MgBr) was added dropwise into the Schlenk tube containing the catalyst. The reaction mixture was stirred at 200 rpm for 2 h at room temperature. After transferring the supernatant to a J. Young NMR tube, the amount of toluene formed was evaluated by <sup>1</sup>H NMR (d1=30 s). The results are shown in **Table S11**.

**Table S11: OH content of 1 and 1-(Red)<sub>2</sub>.**

| Catalyst                   | Amount of OH sites (mmol/g) | No. of OH site per W (OH/W) |
|----------------------------|-----------------------------|-----------------------------|
| <b>1</b>                   | 0.4                         | 2.33                        |
| <b>1-(Red)<sub>2</sub></b> | 0.15                        | 0.94                        |

## K) Redox titration of surface W sites

A solution of ferrocenium hexafluorophosphate (2.3 mg, 0.0063 mmol, 2.5 equiv) in  $d_8$ -THF (0.5 mL) was added at room temperature to 13 mg of **1-(Red)<sub>2</sub>** and the reaction mixture was stirred at 70 °C for 12 h. The filtrate was then separated and analyzed by <sup>1</sup>H NMR using DME (10 μl, 0.080 mmol) as internal standard for quantification. Results of the titration are given in **Table S12**.

**Table S12: Amount of different products observed by <sup>1</sup>H-NMR after reaction of 1-(Red)<sub>2</sub> with FcPF<sub>6</sub>.**

| Products observed   | Amount (equiv/ W) |
|---------------------|-------------------|
| Ferrocene           | 1.66              |
| Tetramethylpyrazine | 0.1               |
| TMS moieties        | 0.8               |

## L) Catalytic activity

### Propene metathesis with **1** at 500 °C

Catalyst **1** (10 mg, 1.9  $\mu\text{mol}$ ) was loaded in a 400 mL reactor flask at 25 °C. The reactor was evacuated under high vacuum ( $10^{-5}$  mbar), and warmed to 500 °C (10 °C/min). Propene (305 mbar, 1.9 mmol, 1000 equiv.) was added. 250  $\mu\text{L}$  aliquots were analysed by GC over time to follow the conversion and the product selectivities.

**Fig. S27:** Conversion vs time, propene metathesis, 0.1 mol% W, 500 °C for **1**

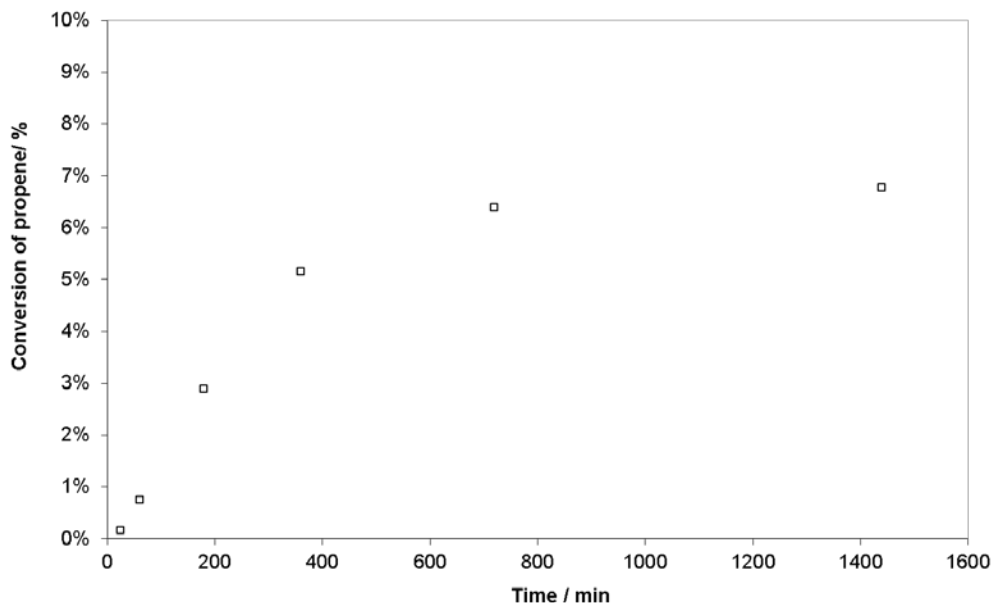

### Metathesis of *cis*-4-nonene in presence of 2 equiv. of Me<sub>4</sub>-BTDP.

At  $t=0$  a 0.97 M solution of *cis*-4-nonene in toluene containing heptane as internal standard (0.11 M) and 2 equiv. of Me<sub>4</sub>-BTDP (with respect to W centers) was added to the catalyst introduced in a conical base vial containing a wing shaped magnetic stirring bar. The reaction mixture was stirred at 600 rpm and kept at 70 °C using an aluminum heating block. 5  $\mu\text{L}$  aliquots of the solution were sampled, diluted with pure toluene (100  $\mu\text{L}$ ) and quenched by the addition of 1  $\mu\text{L}$  of wet ethyl acetate. The resulting solution was analyzed by GC/FID (Agilent Technologies 7890 A) equipped with an HP-5 (Agilent Technologies) column. Conversion is shown by eq.1. Equilibrium conversion is reached at ca. 50%.

$$\text{Product conversion}_t = \frac{\Sigma[\text{products}]_t}{[\text{substrate}]_{\text{ini}}} \quad (1)$$

### Molecular precursors

Catalytic activity of toluene solution of molecular precursors in presence of 2 equiv. of Me<sub>4</sub>-BTDP was investigated. For all these precursors, no activity was observed in the absence of reductant. Conversion, TON and TOF at 70 °C are given in **Table S13**.

**Table S13:** Catalytic activity of the molecular precursors (*cis*-4-nonene, 1 mol% W, 2 mol% Me<sub>4</sub>-BTDP, 70 °C).

| Catalyst (0.1 mol % W)                                       | TOF <sub>3min</sub> (min <sup>-1</sup> ) | TOF <sub>max</sub> (min <sup>-1</sup> ) <sup>a</sup> | Conversion at 24 h |
|--------------------------------------------------------------|------------------------------------------|------------------------------------------------------|--------------------|
| WO(OSi(OtBu) <sub>3</sub> ) <sub>4</sub>                     | <0.1                                     | <0.1                                                 | < 1 %              |
| WO <sub>2</sub> (OSi(OtBu) <sub>3</sub> ) <sub>2</sub> (DME) | <0.1                                     | <0.1                                                 | < 1 %              |

<sup>a</sup> Maximum TOF determined during the test.

### ***Heterogeneous catalysts***

Catalytic activity of heterogeneous precursors in presence of 2 equiv. of Me<sub>4</sub>-BTDP was investigated. For all these precursors, no activity was observed in absence of reductant. Conversion, TON and TOF at 70 °C are given in **Table S14**.

**Table S14:** Catalytic activity of the heterogeneous catalysts (*cis*-4-nonene, 1 mol% W, 2 mol% Me<sub>4</sub>-BTDP, 70 °C).

| Catalyst (0.1 mol % W)                                            | TOF <sub>3min</sub> (min <sup>-1</sup> ) | TOF <sub>max</sub> (min <sup>-1</sup> ) <sup>a</sup> | Time conversion | to |
|-------------------------------------------------------------------|------------------------------------------|------------------------------------------------------|-----------------|----|
| [(≡SiO)W(O)(OSi(OtBu) <sub>3</sub> ) <sub>3</sub> ]               | <0.1                                     | <0.1                                                 | < 1 % after 24h |    |
| [(≡SiO)W(O) <sub>2</sub> (OSi(OtBu) <sub>3</sub> ) <sub>3</sub> ] | <0.1                                     | <0.1                                                 | < 1 % after 24h |    |
| 1                                                                 | 3                                        | 8 (10 min)                                           | 3 h             |    |
| WO <sub>3</sub> /SiO <sub>2</sub>                                 | 1                                        | 2 (320 min)                                          | 24 h            |    |
| MoO <sub>3</sub> /SiO <sub>2</sub>                                | 0.5                                      | 0.6 (60 min)                                         | 24 h            |    |

<sup>a</sup> Maximum TOF determined during the test.

### **Metathesis of *cis*-4-nonene by pre-reduced materials 1-(Red)x**

At t=0 a 0.97 M solution of *cis*-4-nonene in toluene containing heptane as internal standard (0.11 M) was added to the catalysts introduced in a conical base vial containing a wing shaped magnetic stirring bar. The reaction mixture was stirred at 600 rpm and kept at 70 °C using an aluminum heating block. 5 μL aliquots of the solution were sampled, diluted with pure toluene (100 μL) and quenched by the addition of 1 μL of wet ethyl acetate. The resulting solution was analyzed by GC/FID (Agilent Technologies 7890 A) equipped with an HP-5 (Agilent Technologies) column. Conversion, TON and TOF are given in **Table S15**.

**Table S15:** Catalytic activity of the heterogeneous catalysts (*cis*-4-nonene, 1 mol% W, 70 °C).

| Catalyst (0.1 mol % W) | TOF <sub>3min</sub> (min <sup>-1</sup> ) | TOF <sub>max</sub> (min <sup>-1</sup> ) <sup>a</sup> | Time to final conversion |
|------------------------|------------------------------------------|------------------------------------------------------|--------------------------|
| 1-(Red) <sub>0.5</sub> | 5                                        | 8 (10 min)                                           | 3 h                      |
| 1-(Red) <sub>1</sub>   | 2                                        | 3 (10 min)                                           | 6 h                      |
| 1-(Red) <sub>2</sub>   | <1                                       | 2 (540 min)                                          | 12 h                     |

<sup>a</sup> Maximum TOF determined during the test. Values in bracket the time for which maximum TOF was observed.

**Metathesis of 1-nonene by 1 in presence of 2 equiv. of Me<sub>4</sub>-BTDP.**

At t=0 a 0.79 M solution of 1-nonene in toluene containing heptane as internal standard (0.08 M) and 2 equiv. of Me<sub>4</sub>-BTDP (with respect to W centers) was added to the catalyst introduced in a conical base vial containing a wing shaped magnetic stirring bar. The reaction mixture was stirred at 600 rpm and kept at 70 °C using an aluminum heating block. 5 μL aliquots of the solution were sampled (by opening the vial), diluted with pure toluene (100 μL) and quenched by the addition of 1 μL of wet ethyl acetate. The resulting solution was analyzed by GC/FID (Agilent Technologies 7890 A) equipped with an HP-5 (Agilent Technologies) column.

**Fig. S28:** Conversion vs time, 1-nonene homometathesis, 1 mol% W, 2 mol% Me<sub>4</sub>-BTDP, 70 °C.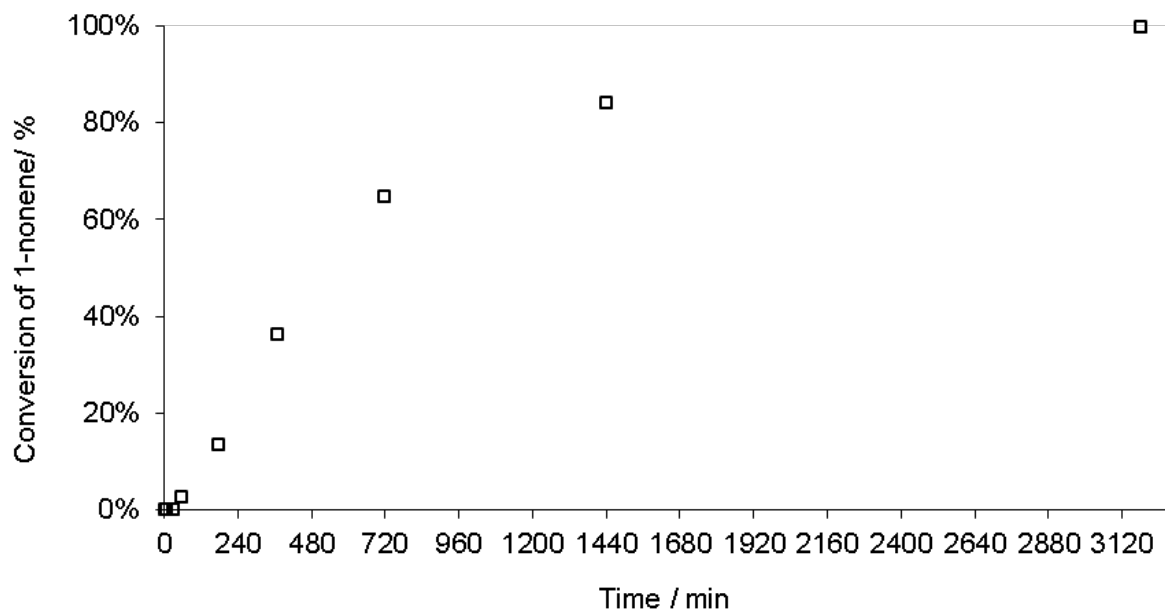



### Metathesis of ethyl oleate by 1 in presence of 2 equiv. of Me<sub>4</sub>-BTDP.

At t=0, a 0.53 M solution of ethyl oleate in toluene containing octadecane as internal standard (0.10 M) and 2 equiv. of Me<sub>4</sub>-BTDP (with respect to W centers) was added to the catalyst introduced in a conical base vial containing a wing shaped magnetic stirring bar. The reaction mixture was stirred at 600 rpm and kept at 70 °C using an aluminum heating block. 5 μL aliquots of the solution were sampled (by opening the vial), diluted with pure toluene (100 μL) and quenched by the addition of 1 μL of wet ethyl acetate. The resulting solution was analyzed by GC/FID (Agilent Technologies 7890 A) equipped with an HP-88 (Agilent Technologies) column. Conversion is shown by eq.1. Equilibrium conversion is reached at ca. 50%.

**Fig. S29:** Conversion vs time, ethyl oleate homometathesis, 1 mol% W, 2 mol% Me<sub>4</sub>-BTDP, 70 °C.

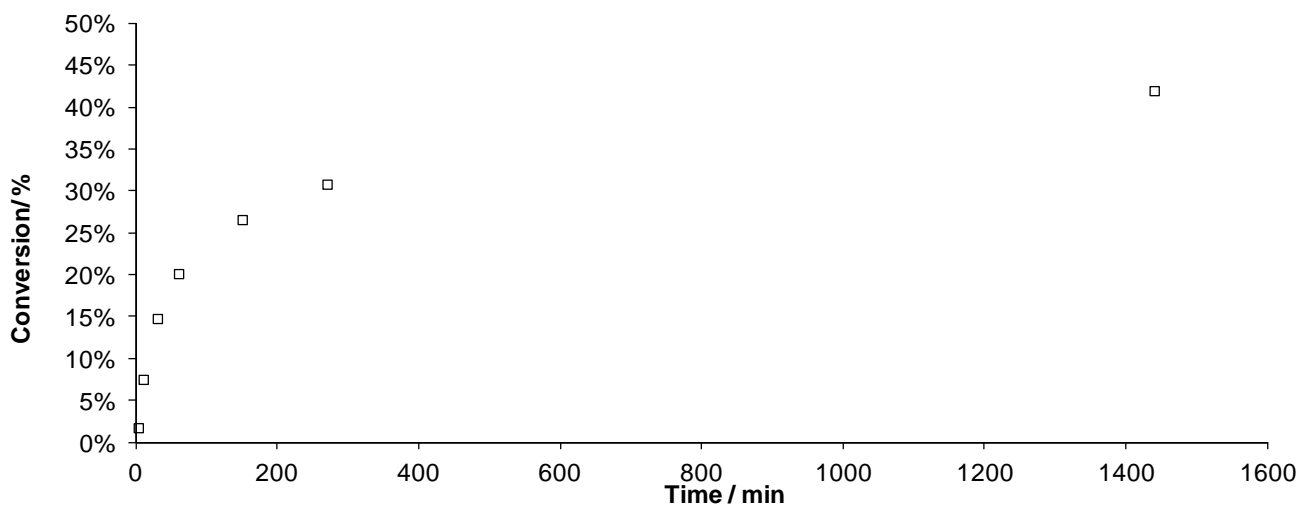

### Propene metathesis with WO<sub>3</sub>/SiO<sub>2</sub> at 100 °C

100 mg (38 μmol) of the selected catalyst (WO<sub>3</sub>/SiO<sub>2</sub> or WO<sub>3</sub>/SiO<sub>2</sub> reduced with 1 equiv. of Me<sub>4</sub>-BTDP) mixed with 2.5 g SiC was loaded into the flow reactor in the glove box. The reactor was then connected to a PID Microactivity reactor, and the connections were flushed with argon:propene 2:1 mixture (in volume) for 2 h. The flow rate of the argon:propene 2:1 mixture was then set to 6 mL·min<sup>-1</sup>, 1.5 bar (3.24 mol propene/ mol W/min<sup>-1</sup>) and the temperature was set to 100 °C. The opening of the valve connecting the reactor to the gas line corresponds to the beginning of the catalytic test. The reaction was monitored by GC using an auto-sampler. Conversion and TONs are presented in Fig. S30 and in Fig. S31 respectively.

**Fig. S30:** Conversion of propene by 7.1 %<sub>wt</sub> WO<sub>3</sub>/SiO<sub>2</sub> (Red squares) and WO<sub>3</sub>/SiO<sub>2</sub> reduced\* (blue diamonds) at 100 °C in flow conditions (see details above). \* ie. after reduction with one equiv. of Me<sub>4</sub>-BTDP.

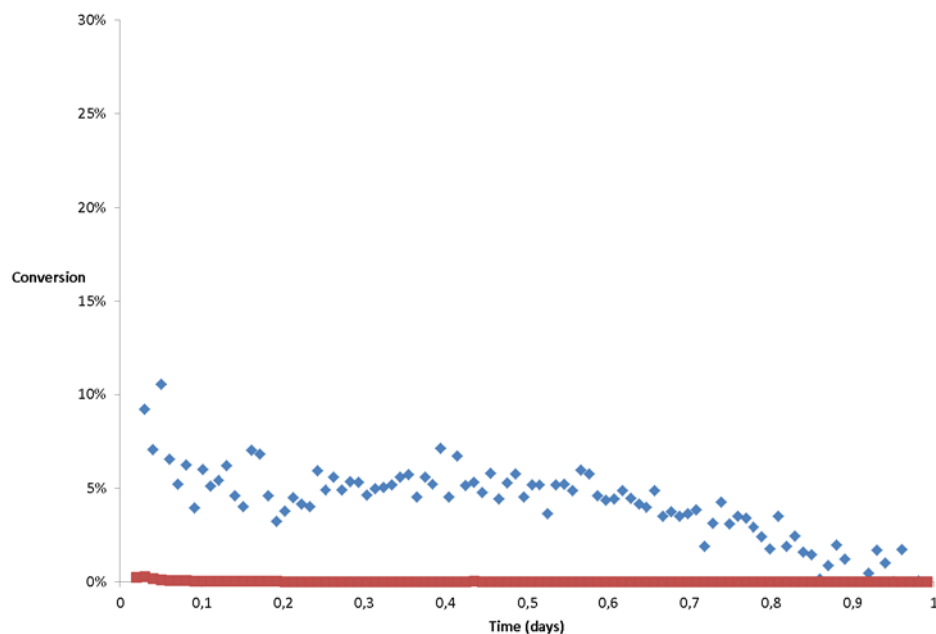

**Fig. S31:** TONs of propene metathesis by 7.1 %<sub>wt</sub> WO<sub>3</sub>/SiO<sub>2</sub> (Red squares) and WO<sub>3</sub>/SiO<sub>2</sub> reduced\* (blue diamonds) at 100 °C in flow conditions (see details above). \* ie. after reduction with one equiv. of Me<sub>4</sub>-BTDP.

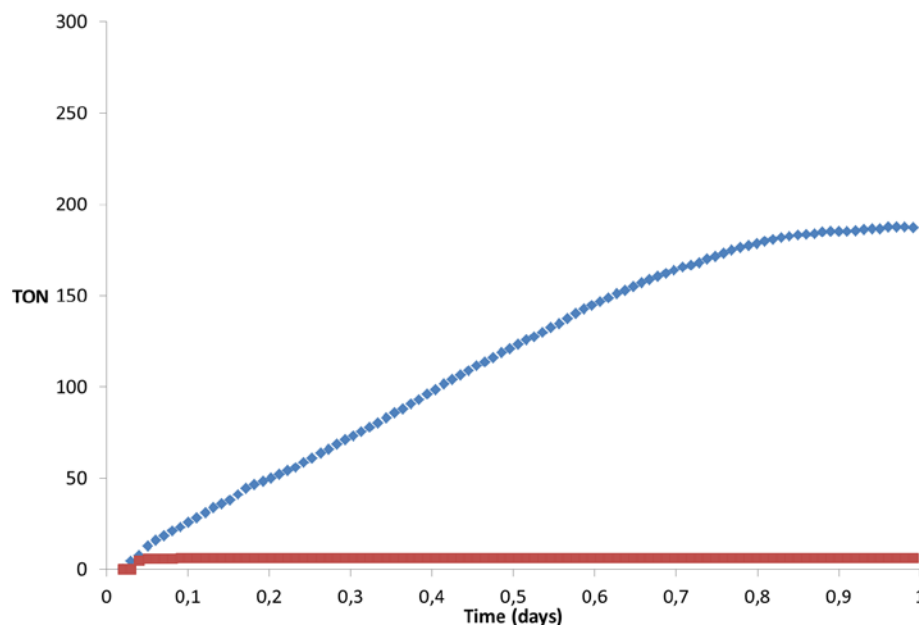

## M) Recycling and poisoning studies

### Recycling

#### Experimental procedure for recycling test: second addition of pure *cis*-4-nonene

At  $t=0$  a 0.97 M solution of *cis*-4-nonene (1000 equiv.) in toluene containing heptane as internal standard (0.11 M) and 2 equiv. of  $\text{Me}_4\text{-BTDP}$  (with respect to W centers) was added to the catalyst introduced in a conical base vial containing a wing shaped magnetic stirring bar. The reaction mixture was stirred at 600 rpm and kept at 70 °C using an aluminum heating block. 5  $\mu\text{L}$  aliquots of the solution were sampled, diluted with pure toluene (100  $\mu\text{L}$ ) and quenched by the addition of 1  $\mu\text{L}$  of wet ethyl acetate. The resulting solution was analyzed by GC/FID (Agilent Technologies 7890 A) equipped with an HP-5 (Agilent Technologies) column. After reaching equilibrium conversion, the liquid phase of the reaction mixture was removed, and a fresh aliquot of *cis*-4-nonene (1000 equiv.) was added to the catalyst, following catalytic activity as described before.

**Fig. S32:** Conversion vs time, *cis*-4-nonene homometathesis, 70 °C, 1000 equiv. of *cis*-4-nonene, 2 equiv. of  $\text{Me}_4\text{-BTDP}$  (Blue diamonds) and after removal of solution and addition of a fresh aliquot of 1000 equiv. of *cis*-4-nonene in absence of  $\text{Me}_4\text{-BTDP}$  (red squares, see procedure above for details).

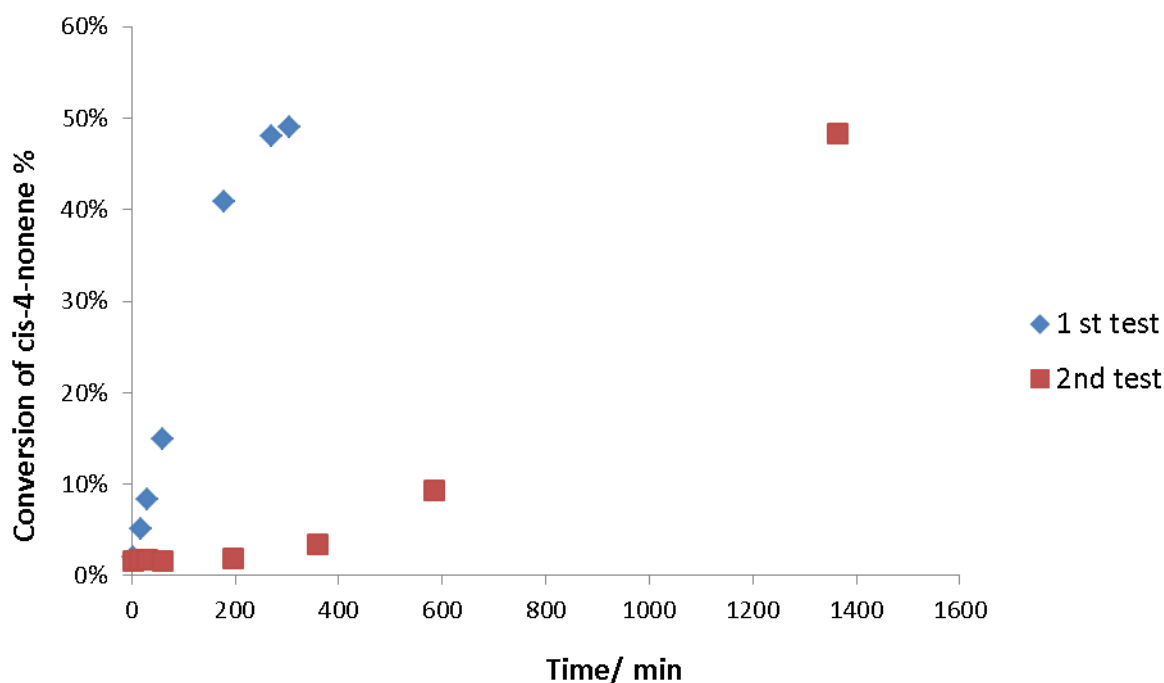

#### Experimental procedure for recycling test: recycling in presence of $\text{Me}_4\text{-BTDP}$

At  $t=0$  a 0.97 M solution of *cis*-4-nonene (1000 equiv.) in toluene containing heptane as internal standard (0.11 M) and 2 equiv. of  $\text{Me}_4\text{-BTDP}$  (with respect to W centers) was added to the catalyst introduced in a conical base vial containing a wing shaped magnetic stirring bar. The reaction mixture

was stirred at 600 rpm and kept at 70 °C using an aluminum heating block. 5  $\mu\text{L}$  aliquots of the solution were sampled, diluted with pure toluene (100  $\mu\text{L}$ ) and quenched by the addition of 1  $\mu\text{L}$  of wet ethyl acetate. The resulting solution was analyzed by GC/FID (Agilent Technologies 7890 A) equipped with an HP-5 (Agilent Technologies) column. After reaching equilibrium conversion, the liquid phase of the reaction mixture was removed, and a fresh aliquot of *cis*-4-nonene (1000 equiv.) and  $\text{Me}_4\text{-BTDP}$  (1 equiv.) was added to the catalyst for the 2<sup>nd</sup> and 3<sup>rd</sup> test, following catalytic activity as before.

**Fig. S33:** Conversion vs time, *cis*-4-nonene homometathesis, 70 °C, 1000 equiv. of *cis*-4-nonene, 2 equiv. of  $\text{Me}_4\text{-BTDP}$  (Blue diamonds) and after removal of solution and addition of a fresh aliquot of 1000 equiv. of *cis*-4-nonene and 1 equiv. of  $\text{Me}_4\text{-BTDP}$  (red squares. Conversion for the same process repeated a second time is given in green triangles (see procedure above for details). The 2<sup>nd</sup> test has similar induction period than  $[\text{WO}_2(\text{Red})_2]$ .

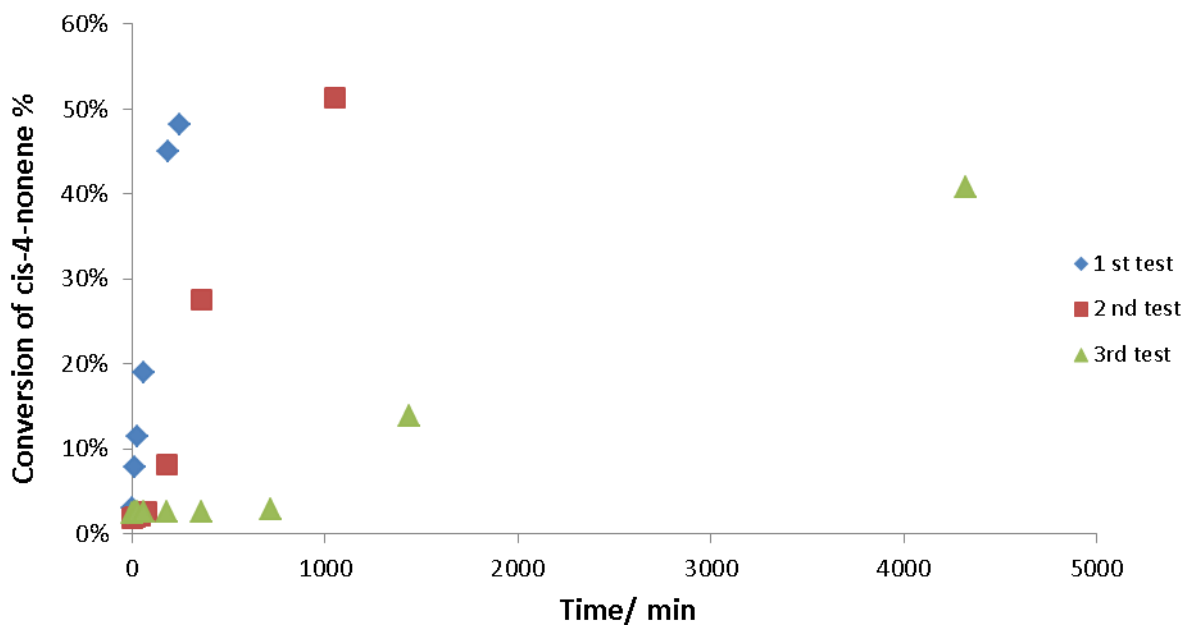

## Poisoning and reactivation

### General procedure:

A 0.97 M solution of *cis*-4-nonene (1000 equiv.) in toluene containing heptane as internal standard (0.11 M) was added to the catalysts introduced in a conical base vial containing a wing shaped magnetic stirring bar. The reaction mixture was stirred at 600 rpm and kept at 70 °C using an aluminum heating block for 1.5 h. Catalytic activity of the material was ensured by following activity by GC (5  $\mu$ L aliquots, procedure described above). The catalyst was then contacted with H<sub>2</sub>O (1 equiv., in toluene), O<sub>2</sub> (excess) or EtOH (1 equiv., in toluene) and stirred for 1.5 h. No further conversion was observed with respect to the conversion measured at the introduction of the H<sub>2</sub>O, O<sub>2</sub> or EtOH respectively. The solution was then removed by filtration and a new batch of *cis*-4-nonene solution (1000 equiv.) was added. No catalytic activity at 24 h was observed in all cases confirming the complete deactivation of the catalyst after poisoning. At t=0, 2 equivalents of Me<sub>4</sub>-BTDP (with respect to W centers) were added to the reaction mixture. Conversion vs. time after H<sub>2</sub>O, O<sub>2</sub> and EtOH poisoning and addition of 2 equiv. of Me<sub>4</sub>-BTDP are shown in Fig. S34, Fig. S35 and Fig. S36 respectively.

**Fig. S34:** Conversion vs time, *cis*-4-nonene (1000 equiv.) homometathesis at 70 °C after reactivation by additional 2 equiv. of Me<sub>4</sub>-BTDP after H<sub>2</sub>O poisoning

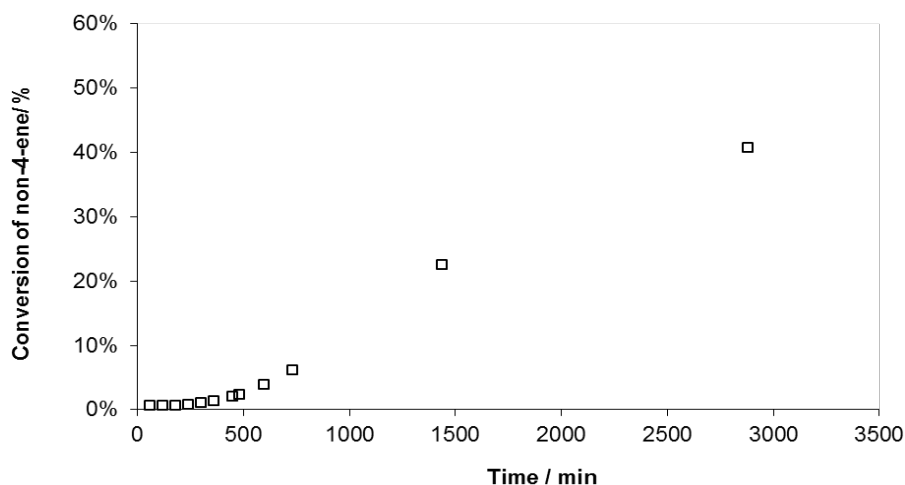

**Fig. S35:** Conversion vs time, *cis*-4-nonene (1000 equiv) homometathesis at 70 °C after reactivation by additional 2 equiv. of Me<sub>4</sub>-BTDP after O<sub>2</sub> poisoning

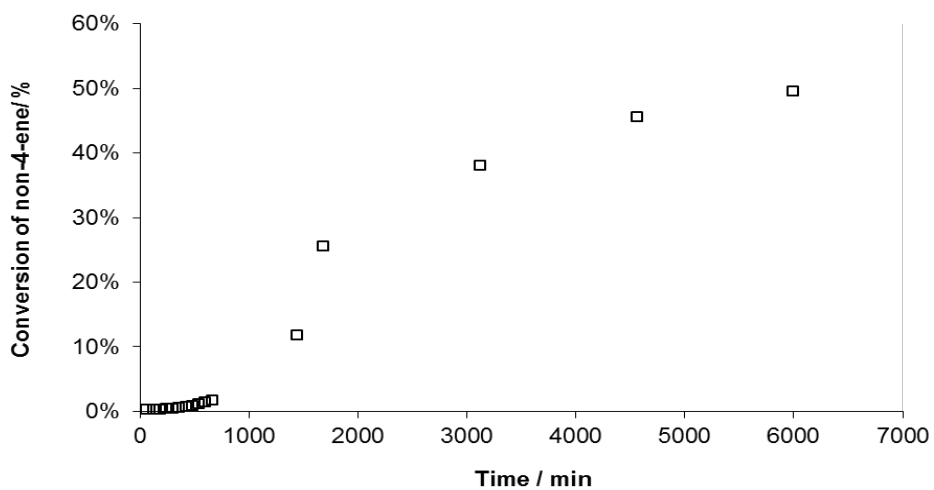

**Fig. S36:** Conversion vs time, *cis*-4-nonene (1000 equiv) homometathesis at 70 °C after reactivation by additional 2 equiv. of Me<sub>4</sub>-BTDP after EtOH poisoning

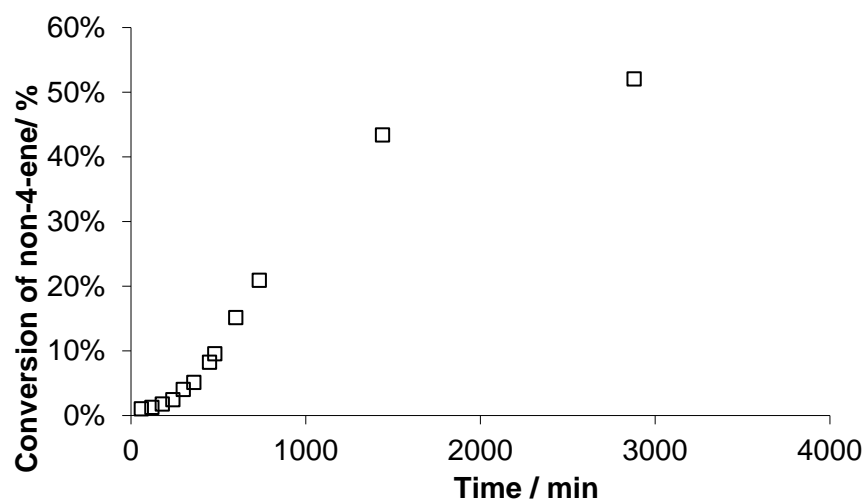

## N) Characterization of the active sites and mechanism

### 1) Exposure of 1-(Red)<sub>2</sub> to ethylene

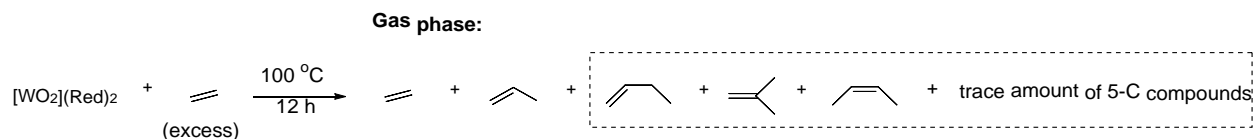

**1-(Red)<sub>2</sub>** (62.1 mg) was loaded in a 26 mL glass reactor and contacted with ethylene (9.4 equiv. per W metal center). After 12 h at 100 °C, the gas phase was analyzed by GC-FID and GC-MS showing the presence of unreacted ethylene, propylene (0.5 equiv.) and a mixture of four-carbon containing hydrocarbons (1-butene, *cis*-2-butene, *trans*-2-butene and *iso*-butene; in total 0.03 equiv.).

Good reproducibility in the amount of propylene released was confirmed while reproducing twice this experiment on different samples of **1-(Red)<sub>2</sub>**.

**Table S16:** Analysis of the gas phase after exposing reduced **1-(Red)<sub>2</sub>** to ethylene (12 h, 100 °C).

| ethylene added (equiv.) | propene released (equiv.) | C4 products released (equiv.) |
|-------------------------|---------------------------|-------------------------------|
| 9.4                     | 0.50                      | 0.03                          |

### 2) Exposure of 1-(Red)<sub>2</sub> to <sup>13</sup>C dilabeled ethylene

**1-(Red)<sub>2</sub>** (36 mg) was loaded in a 26 mL glass reactor and contacted with <sup>13</sup>C dilabeled ethylene (32 equiv. per W metal center). After 12 h at 100 °C, the gas phase was evacuated under high vacuum (10<sup>-5</sup> mbar, 1 h). <sup>1</sup>H, <sup>13</sup>C solid state NMR and HETCOR spectrum of this material are given in Fig. S12, Fig. S13 and Fig. S14, respectively.

### 3) Br<sub>2</sub> exposure

**1-(Red)<sub>2</sub>** was first exposed to ethylene with the procedure described in experiment N)1). The sample was then evacuated under high vacuum (10<sup>-5</sup> mbar) for 1 h followed by the addition of a bromine solution (4 equiv., 0.19 M) in dibromomethane at -78 °C. The reaction mixture was stirred at room temperature for 2 h and quenched with a concentrated sodium thiosulphate solution. The organic layer was extracted by ethyl acetate (1 mL x 3) and dried over anhydrous magnesium sulfate. The organic layer was then analyzed by GC-MS showing the presence of 1,4-dibromobutane.

**Fig. S37:** GC-MS chromatogram of the reaction mixture after Br<sub>2</sub> exposure (procedure described above).

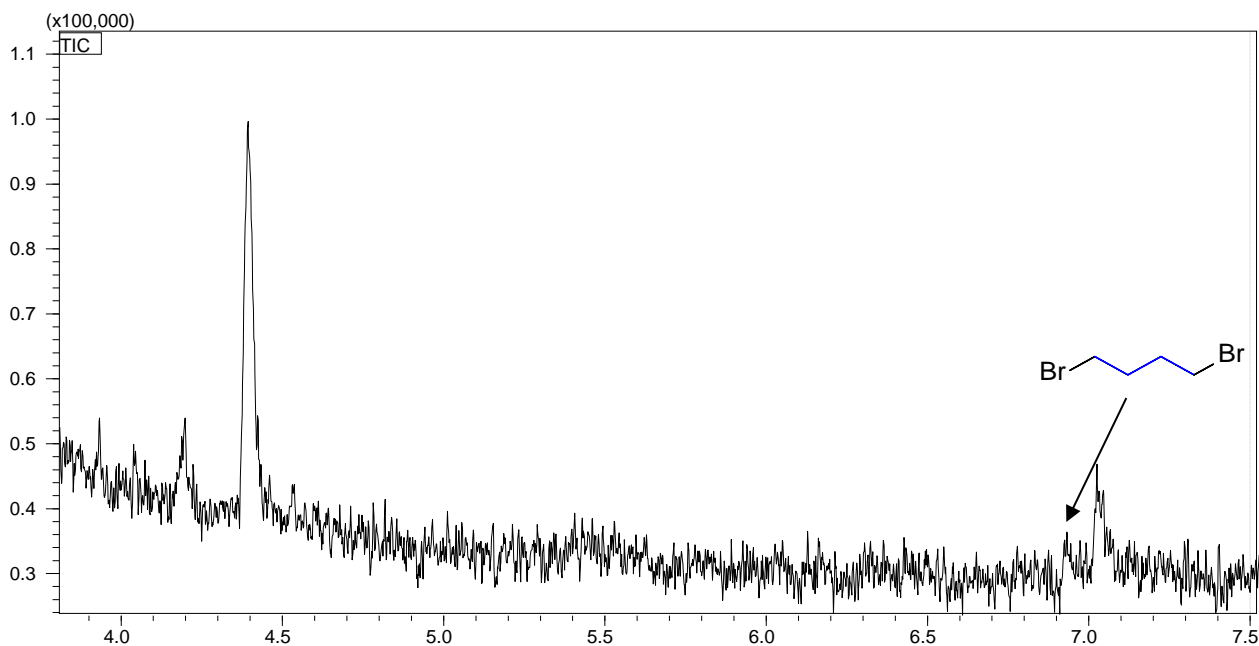

**Fig. S38:** Experimental MS spectrum of 1,4-dibromobutane (peak from 6.9 to 7 min retention time).

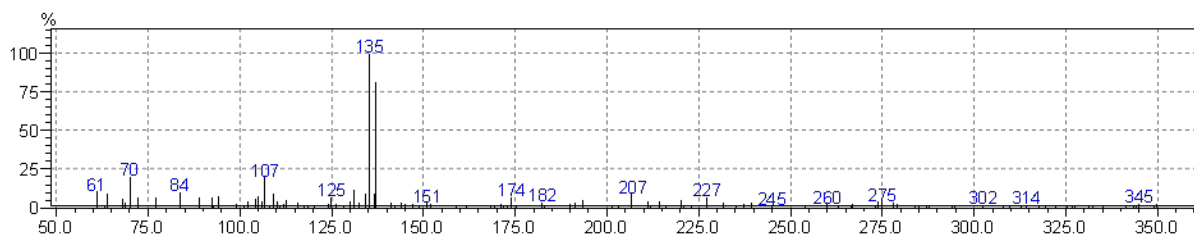

**Fig. S39:** Reference MS spectrum of 1,4-dibromobutane from NIST database

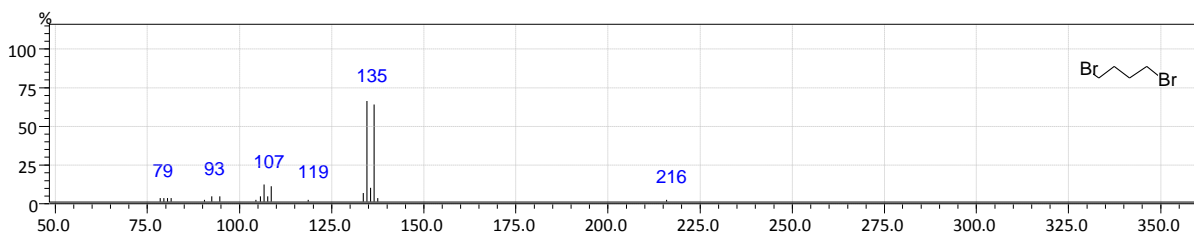

#### 4) Isotopic exchange

The sample collected in experiment N)1) was evacuated under high vacuum ( $10^{-5}$  mbar) for 1 h and was then contacted with <sup>13</sup>C dilabelled ethylene (6.9 equiv.). After 12 h at 100 °C, the gas phase was analyzed by GC-FID and GC-MS showing the presence of unreacted dilabeled



ethylene, but also of mono- (0.6 equiv.) and non-labelled (0.15 equiv.) ethylene. No C3, C4 or C5 products were observed in the gas phase.

The amount of mono-labelled ethylene determined in this titration and the amount of propylene formed in the initiation step (experiment N)1)) are ca. 1:1.

## O) References

1. Ross-Medgaarden, E. I.; Wachs, I. E., Structural Determination of Bulk and Surface Tungsten Oxides with UV-vis Diffuse Reflectance Spectroscopy and Raman Spectroscopy. *J. Phys. Chem C* **2007**, *111*, 15089-15099.
2. Dreisch, K.; Andersson, C.; Stålhandske, C., Synthesis and structure of dimethoxyethane-dichlorodioxo-tungsten(VI)—a highly soluble derivative of tungsten dioxodichloride. *Polyhedron* **1991**, *10*, 2417-2421.
3. Rice, C. A.; Kroneck, P. M. H.; Spence, J. T., Tungsten(V)-oxo and tungsten(VI)-dioxo complexes with oxygen, nitrogen, and sulfur ligands. Electrochemical, infrared, and electron paramagnetic resonance studies. *Inorg. Chem.* **1981**, *20*, 1996-2000.
4. Laguerre, M.; Dunogues, J.; Calas, R.; Duffaut, N., Silylation reductrice de derives monoaromatiques fonctionnels. *J. Organomet. Chem.* **1975**, *93*, C17-C19.
5. Saito, T.; Nishiyama, H.; Tanahashi, H.; Kawakita, K.; Tsurugi, H.; Mashima, K., 1,4-Bis(trimethylsilyl)-1,4-diaza-2,5-cyclohexadienes as Strong Salt-Free Reductants for Generating Low-Valent Early Transition Metals with Electron-Donating Ligands. *J. Am. Chem. Soc.* **2014**, *136*, 5161-5170.
6. Jarupatrakorn, J.; Coles, M. P.; Tilley, T. D., Synthesis and Characterization of  $\text{MO}[\text{OSi}(\text{OtBu})_3]_4$  and  $\text{MO}_2[\text{OSi}(\text{OtBu})_3]_2$  (M = Mo, W): Models for Isolated Oxo-Molybdenum and -Tungsten Sites on Silica and Precursors to Molybdena- and Tungsta-Silica Materials. *Chem. Mat.* **2005**, *17*, 1818-1828.
7. Alphazan, T.; Bonduelle-Skrzypczak, A.; Legens, C.; Gay, A.-S.; Boudene, Z.; Girleanu, M.; Ersen, O.; Copéret, C.; Raybaud, P., Highly Active Nonpromoted Hydrotreating Catalysts through the Controlled Growth of a Supported Hexagonal  $\text{WS}_2$  Phase. *ACS Catal.* **2014**, *4*, 4320-4331.
